# Supplementary material
Source: Copernicus journal article supplement (doi:10.5194/essd-2026-68)
Supplement: Supplementary file [file essd-2026-68-AC1-supplement.pdf]

## Response to Reviewer 1's Comments

Dear reviewer,

We sincerely thank you for your careful reading of our manuscript and for the constructive and insightful comments. We greatly appreciate your recognition of the importance of quantifying vegetation structural complexity in coastal ecosystems, as well as the concerns raised regarding the conceptual basis of VSRE, the fairness of metric comparisons, and the manuscript's overall focus and presentation.

In response to these comments, we have carefully revised the manuscript at both the conceptual and structural levels. First, we have clarified that VSRE is not intended to represent all dimensions of vegetation structural complexity, but rather to quantify a specific, ecologically meaningful dimension: spatial configurational heterogeneity. Second, we have substantially strengthened the description of the experimental basis for the low-, medium-, and high-VSC groups, and further clarified the role of the biomass-based Shannon index as an independent ecological proxy rather than a direct ground truth of VSC. Third, we have reorganized the manuscript to emphasize better the main storyline of this study: the development of VSRE, its validation using fixed plots and field LiDAR samples, and its first wall-to-wall application along the coast of China. In addition, we have revised the title, improved the structure of the Introduction and Methods, clarified the distinction between fixed-plot validation and nationwide field sampling, strengthened the presentation of classification and mapping results, and added or redesigned key figures to improve clarity and transparency.

We believe that these revisions have substantially improved the manuscript and have made our study more focused, rigorous, and accessible. Below, we provide a detailed, point-by-point response to each comment. Once again, we sincerely thank you for your valuable comments.

*(Black Italic: reviewer comments; Blue: our responses; Purple: revised text).*

23 **Comment 1:** *Vegetation structural complexity (VSC) is increasingly recognized as a key attribute influencing*  
24 *ecosystem processes and functions. The quantification of VSC from 3D LiDAR data has therefore become an important*  
25 *area of research to support such studies. In this work, the authors investigate methodologies for quantifying VSC*  
26 *specifically in coastal ecosystems, propose a new index, namely VSRE, and demonstrate that this metric outperforms*  
27 *existing approaches. They further combine this metric with the latest Google AEF dataset to produce a nationwide*  
28 *VSC product. Overall, this is a timely study for advancing VSC research in coastal ecosystems, and the resulting*  
29 *dataset is valuable. However, I have several major concerns that prevent me from recommending its publication in*  
30 *its current form.*

31 **Response:** We are very grateful for your recognition of the value of our research. Your encouraging comments on the  
32 clarity, organization, and contribution of our study are highly appreciated, and they motivate us to refine our work  
33 further.

34

35 **Comment 2:** *First, I have difficulty understanding the rationale for using relative entropy to quantify VSC.*  
36 *Fundamentally, relative entropy measures the dissimilarity of LiDAR point distributions between different voxels. It*  
37 *is unclear how this directly reflects vegetation structural complexity. By definition, structural complexity relates to*  
38 *both the randomness of canopy element distribution and the extent of space occupation. In this sense, VSC should*  
39 *capture at least two components: the abundance of structural elements and the variability in their spatial arrangement.*  
40 *However, strong dissimilarity between layers does not necessarily indicate high structural complexity. For instance,*  
41 *in tropical forests, the canopy is often densely filled due to complementary layering, resulting in relatively similar*  
42 *element distributions across layers. Despite this similarity, such forests exhibit high structural complexity. Therefore,*  
43 *I remain fundamentally uncertain about the appropriateness of using relative entropy as a metric for quantifying VSC.*

44 **Response:** We appreciate you raising this fundamental question. We agree that VSC is a multidimensional concept  
45 for which no single, universally accepted definition currently exists. Consequently, no individual metric can fully  
46 represent all aspects of VSC. Previous studies have characterized VSC from different structural perspectives and have  
47 adopted diverse metric systems for its quantification. In a broad sense, VSC is commonly understood as the three-  
48 dimensional organization of vegetation elements, including leaf area and density, canopy height, canopy arrangement,  
49 canopy openness, and spatial variability (Coverdale and Davies, 2023). This concept can also be summarized, as you  
50 noted, as the spatial occupancy of structural elements and the variability or randomness of their arrangement.

51 Based on this understanding, we wish to clarify that VSRE was not designed to serve as a unified metric covering  
52 all dimensions of VSC. Instead, it focuses on a specific but ecologically meaningful dimension: the relative  
53 configurational differences and local heterogeneity of vegetation structural elements in three-dimensional space. In  
54 other words, VSRE primarily targets spatial configurational heterogeneity rather than structural occupancy itself. This  
55 focus on a particular structural dimension is not unique to VSRE. Many widely used VSC metrics also emphasize  
56 specific aspects of structural complexity rather than its full multidimensional meaning. For example, FHD mainly  
57 reflects the vertical distribution of vegetation elements among height layers, rugosity emphasizes variation in canopy  
58 surface height, and canopy entropy focuses on the uncertainty of spatial point distributions. These metrics infer the  
59 broader concept of structural complexity by quantifying explicit features of vegetation organization in point clouds.

60 Therefore, the central question is not whether VSRE explicitly encodes every component of VSC, but whether the  
61 structural dimension quantified by VSRE has a clear ecological meaning and is appropriate for the target ecosystem.

62 We acknowledge that the mentioned example of tropical forests provides an important reminder. In tropical  
63 forests with strong vertical infilling and complementary canopy layers, spatial occupancy and multilayer filling are  
64 indeed important components of structural complexity. However, the present study focuses on coastal wetlands rather  
65 than mature tropical forests. Compared with those of forest ecosystems, coastal wetland vegetation is generally lower  
66 in height, more open in canopy structure, and more spatially patchy, often consisting of mixed herbaceous (saltmarshes)  
67 and woody vegetation (mangroves), interspersed with bare tidal flats and water surfaces. In such ecological settings,  
68 local differences in spatial arrangement and configurational heterogeneity may better reflect structural differences  
69 among communities than simple measures of space occupation. Spatial occupancy can often be described by  
70 cumulative metrics such as canopy cover or biomass, but these metrics may become relatively homogeneous in  
71 communities dominated by dense herbaceous vegetation with sparse woody components. This consideration  
72 motivated our development of VSRE at the very first. Our results (Figs. 3, 4, and 5) further showed that conventional  
73 metrics more closely related to structural occupancy, such as canopy cover and mean vegetation height, did not  
74 consistently reflect the expected complexity gradient in coastal wetland fixed plots. By contrast, VSRE demonstrated  
75 greater stability in discrimination across different point cloud densities and more effectively captured continuous  
76 gradients of structural variation.

77 We also recognize the more fundamental concern you raised: relative entropy measures differences in LiDAR  
78 point-cloud distributions across voxels or windows, but why should these differences reflect vegetation structural  
79 complexity? In our view, this link is not arbitrary. LiDAR point clouds capture the discrete spatial distribution of  
80 vegetation structural elements in three dimensions. When a local point cloud is voxelized and normalized within a  
81 sliding window, the resulting voxel histogram represents the spatial distribution function of the local vegetation  
82 structure. Differences in such distribution functions across windows therefore do not merely reflect differences in  
83 point counts. Instead, they indicate whether local structural configurations are repeated in similar ways or vary across  
84 space. If voxel distributions are highly similar among windows, the community structure is spatially repetitive and  
85 homogeneous. Conversely, large differences among window-level distributions indicate stronger local heterogeneity  
86 and greater variation in spatial configuration. We therefore regard local configurational difference as an important  
87 dimension of VSC, especially in relation to structural heterogeneity rather than structural occupancy.

88 Accordingly, in the revised manuscript, we will clarify the conceptual boundary of VSRE. VSRE should be  
89 understood as a structural metric designed to quantify spatial configurational heterogeneity. It is intended to  
90 complement existing VSC metrics, rather than to replace all other definitions or dimensions of vegetation structural  
91 complexity.

92 **Revised text:**

93 *Main text: Line 585-593*

94 *Second, VSRE should be interpreted as an index that primarily captures spatial configurational heterogeneity rather*  
95 *than the total area of occupied vegetation. In a broad ecological sense, vegetation structural complexity may include*  
96 *both spatial occupancy and spatial heterogeneity (Coverdale and Davies, 2023). VSRE is more closely aligned with*

97 the latter because it compares differences among local voxel-based structural distributions. Therefore, in structurally  
98 more complex ecosystems or in mature ecosystems where vegetation space is nearly saturated, VSRE alone may not  
99 fully capture all dimensions of structural complexity. In such cases, combining VSRE with complementary metrics  
100 such as canopy cover, vegetation height, or a spatial occupancy index (Zhao et al., 2026) would provide a more  
101 complete characterization of VSC.

102 .  
103 **Comment 3:** *Second, the comparison among metrics appears methodologically unclear and potentially unfair. The*  
104 *authors used three groups of plots—categorized as low, medium, and high VSC—to evaluate the performance of the*  
105 *proposed metric against existing ones. However, it is not clear how these groups were defined in the field. Were they*  
106 *based on visual assessment or some quantitative criteria? Given that VSC is inherently difficult to measure directly,*  
107 *establishing reliable ground-truth data is challenging without the use of simulation or well-defined structural proxies.*

108 **Response:** Thank you for this important comment. We apologize for the lack of clarity in this section. We agree that,  
109 because VSC is difficult to measure directly, any plot grouping used to compare the performance of different structural  
110 metrics must be clearly defined, repeatable, and as independent as possible from the metrics being evaluated. We want  
111 to clarify that the low-, medium-, and high-VSC groups in this study were not defined solely by subjective human-  
112 visual assessment. Instead, they were derived from three representative coastal wetland community structure scenarios  
113 formed within a controlled near-natural experimental fixed plot and were further supported by independent field  
114 survey data.

115 Specifically, the experimental fixed plots used in this study were not natural plots selected at random, but were  
116 designed to represent three typical coastal wetland community-structure scenarios (Fig. 1, 2). The first scenario was  
117 a monodominant herbaceous community commonly associated with high salinity and high tide-level conditions,  
118 represented by the globally widespread *Phragmites australis* community. The second scenario was a mixed  
119 herbaceous community under medium-salinity and low-tide-level conditions. The third scenario was a mixed  
120 herbaceous--woody community under low-salinity and high-land with drier habitat conditions, which is more  
121 commonly observed in mangrove--saltmarsh ecotones.

122 In terms of ecological and structural characteristics, these three scenarios broadly correspond to an increasing  
123 complexity gradient under nearly-natural conditions, from monodominant saltmarsh vegetation to mixed herbaceous  
124 communities and then to herbaceous--woody assemblages. More importantly, these communities were not artificially  
125 planted or assembled. Instead, they developed through near-natural succession after ground-water levels above the  
126 water table (to simulate tide level) were regulated in this experimental platform, which has been operating since 2018.  
127 Besides, six replicate plots were established for each scenario to improve sample representativeness and  
128 reproducibility. Therefore, the structural gradient represented by these three plot groups was primarily defined by the  
129 experimental design and community formation processes, rather than by post hoc subjective visual assessment.

130 To further verify the objectivity of this structural gradient, we conducted herbaceous vegetation surveys and  
131 individual-tree segmentation during the same period as the LiDAR data collection (Fig. S3, 2025), and we quantified  
132 biomass and diversity across all sub-plots. Using these data, we constructed a biomass-weighted Shannon index based  
133 on each species' biomass proportion. This index served as an independent, continuous ecological proxy to examine

134 whether the three subplot groups exhibited a significant structural complexity gradient. Rather than using individual  
135 abundances, as is common in many diversity calculations, we used each species' total biomass. This choice was  
136 necessary because herbaceous plants and woody trees often differ greatly in individual abundance, yet such numerical  
137 differences do not imply proportional differences in their contributions to spatial structural complexity. By contrast,  
138 biomass provides a common currency across growth forms and better reflects the relative contribution of different  
139 species to community structure, making it more appropriate for coastal wetland communities with large trait contrasts  
140 among plant growth forms. We further clarify that the Shannon index was not introduced here as a direct ground truth  
141 of VSC. Rather, in this experimental system, it provides a relatively bottom-up and objective structural reference at  
142 the level of community composition. As community biomass composition shifts from dominance by a single species  
143 to a more diverse assemblage, and from purely herbaceous vegetation to herbaceous--woody communities, the types  
144 and relative configurations of structural elements within the community generally increase in parallel. This pattern is  
145 consistent with our field observations of vegetation complexity in the sample plots (Fig. 2). Therefore, we consider  
146 this index an independent external proxy supporting the existence of a structural gradient, rather than a repeated  
147 expression of the metric being tested.

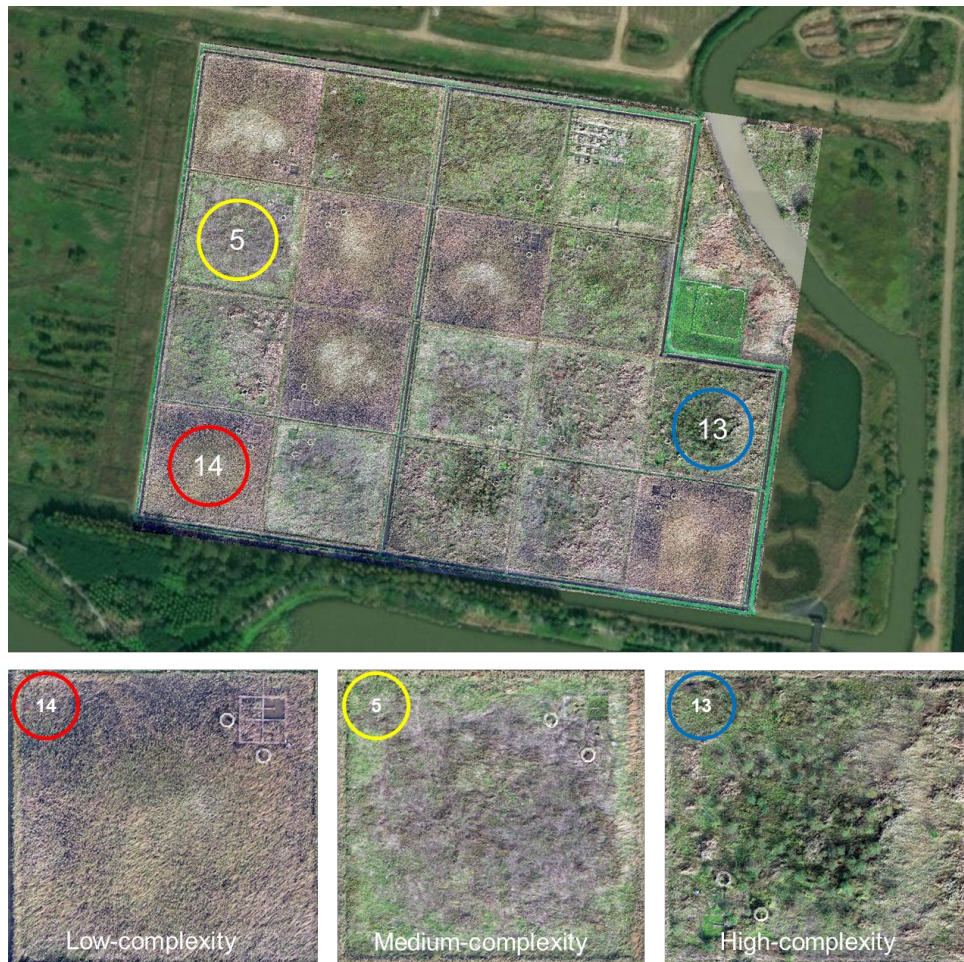

148  
149 **Fig 2. A high-resolution optical image of the fixed plot acquired in March 2025, with a spatial resolution of 0.5**  
150 **cm pixel<sup>-1</sup>.**

151 The relevant results are shown in Fig. S3, which indicates a clear, consistent relationship between the human-  
 152 observed and quantified gradients across the three subplot groups. We acknowledge that this supplementary figure  
 153 was not explicitly cross-referenced in the main text, which made the basis of the grouping insufficiently clear. In the  
 154 revised manuscript, we will add this explanation and explicitly state that Fig. S3 does not use the Shannon index as a  
 155 direct ground truth of VSC. Instead, it uses an independent external proxy to support the rationale for the structural  
 156 gradient represented by the three plot groups.

157 We also fully recognize that VSC in natural ecosystems does not always occur as discrete groups. More  
 158 commonly, it varies continuously and may involve subtle structural differences. Therefore, we further introduced a  
 159 continuous-gradient test in **Section 1.3.3**. In this analysis, the biomass-weighted Shannon index was used as a  
 160 continuous external reference to test whether VSRE could respond to subplots without obvious categorical groupings  
 161 but with gradual differences in VSC. The results showed that VSRE not only distinguished the three predefined  
 162 structural scenarios but also maintained high sensitivity and stability along a continuous complexity gradient. This  
 163 analysis complements the discrete-group comparison: the group-based test evaluates the discriminatory ability of the  
 164 metrics in representative structural scenarios, whereas the continuous-gradient test further shows that VSRE is not  
 165 effective only for strongly differentiated groups but can also detect more subtle structural variation that commonly  
 166 occurs in natural ecosystems.

167 Based on these considerations, we believe that the three subplot groups used in this study have clear ecological  
 168 representativeness, experimental reproducibility, and independent external support. They therefore provide a  
 169 reasonable gradient system for evaluating the discriminatory ability of VSRE and other structural metrics in coastal  
 170 wetland settings. In addition, the continuous-gradient analysis in **Section 1.3.3** further supports the effectiveness of  
 171 VSRE in detecting more subtle structural variation closer to real ecological conditions.

172 **Revised text and figures:**

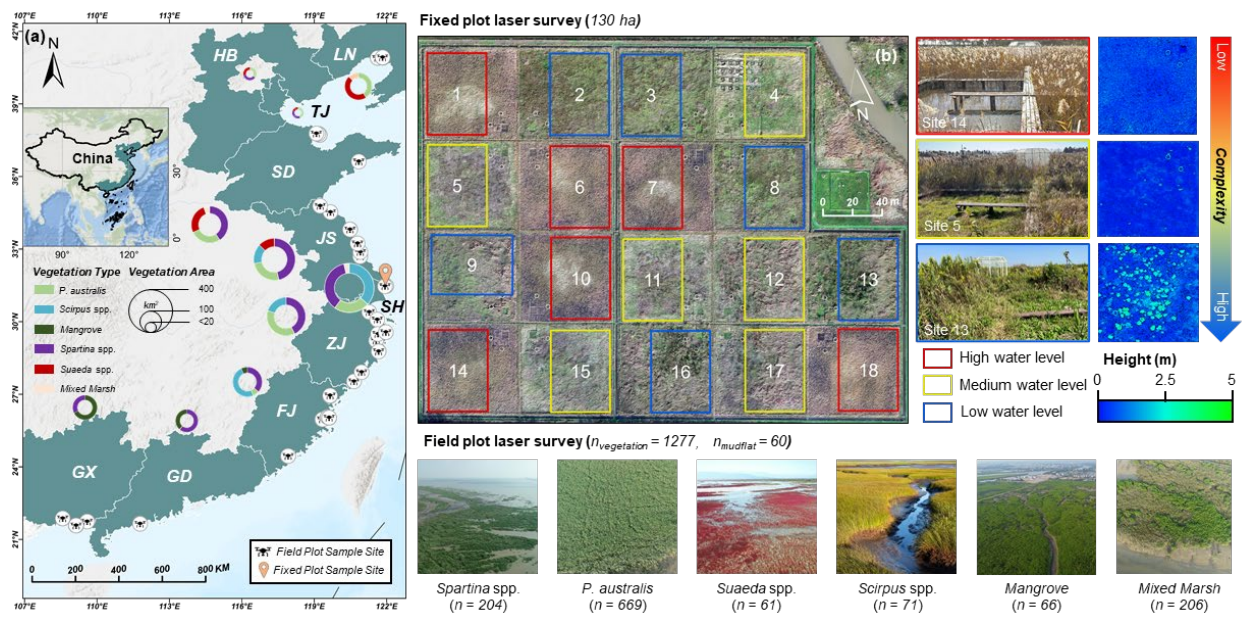

173

174 **Fig. 1 | Overview of fixed plots and spatial layout of field drone sampling sites.** a, Spatial distribution of all LiDAR  
 175 sampling locations. Blue-green shading indicates sampled provinces, abbreviated with two-letter codes; drone icons  
 176 represent the field LiDAR sampling sites, and the orange icon indicates the location of the fixed sampling site. b,  
 177 LiDAR sampling conditions within fixed plots and primary vegetation communities surveyed. The LiDAR acquisition  
 178 ranges under varying water levels are illustrated using three-color boxes, indicating that VSC decreases significantly  
 179 as tidal levels rise. Representative field photos and digital surface elevation profiles from three sampling points are  
 180 displayed on the right. Field-collected LiDAR data encompass six typical coastal wetland vegetation types, including  
 181 succulent herbs (*Suaeda* spp., *Scirpus* spp.), graminoid vegetation (*Phragmites australis*, *Spartina* spp.), mixed marsh  
 182 communities, and tree-dominated communities (mangroves).

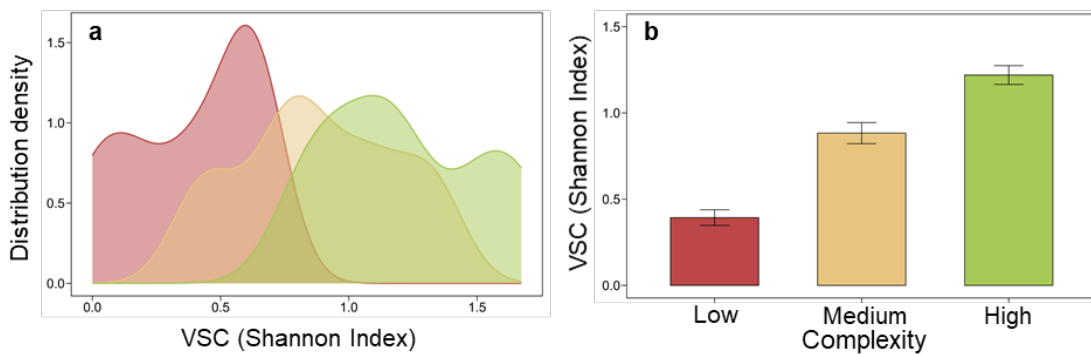

184  
 185 **Fig. S3 | VSC index distribution characteristics constructed based on the Shannon index.** a, the VSC distribution  
 186 curve was fitted using kernel density estimation. b, Mean values of VSC in groups with different human-defined  
 187 complexity. Error bars indicate standard deviation.

188  
 189 **Comment 4:** Furthermore, I do not consider the comparison between VSC and species richness to be a robust or  
 190 appropriate way to demonstrate the superiority of the proposed metric. The relationship between VSC and species  
 191 richness remains debated in the literature and is not necessarily positive or consistent. For example, in northern  
 192 temperate forests, single-layer, monocultural stands can still exhibit relatively high VSC due to selection effects and  
 193 high space occupation.

194 **Response:** We appreciate your important comment. We agree that there is no universal or necessary positive  
 195 relationship between species richness, biodiversity, and vegetation structural complexity. As you noted, in some forest  
 196 ecosystems, even stands with relatively homogeneous species composition, such as single-layer plantations or  
 197 communities dominated by a single species, may exhibit high values for certain structural complexity metrics (canopy  
 198 cover or density) due to high spatial occupancy, canopy density, or selection effects. We therefore agree that species  
 199 richness alone cannot serve as a universal standard for validating VSC metrics.

200 We want to clarify that this study did not use species richness to directly evaluate VSC, nor did it treat biodiversity  
 201 as the definition or absolute ground truth of VSC. Instead, we used a biomass-weighted Shannon index. The purpose  
 202 of this index was not to argue that higher biodiversity necessarily leads to higher VSC, but rather to construct an  
 203 independent, continuous gradient of community composition and structural material distribution within our fixed plots.

204 This gradient was used as a supplementary reference to examine whether different structural metrics could capture  
205 continuous structural variation among the plots.

206 This approach was motivated by the specific characteristics of our study system. The fixed plots contained both  
207 herbaceous and woody plants, which differed greatly in individual abundance, body size, and contribution to spatial  
208 structure. If conventional diversity metrics were calculated directly using species richness or individual abundance,  
209 the extremely large number of herbaceous individuals could mask the contribution of woody plants to three-  
210 dimensional structure and introduce substantial bias. We therefore used biomass, rather than individual abundance, to  
211 calculate the Shannon index. Although biomass is not equivalent to structural complexity itself, it represents an  
212 important material basis for the formation of three-dimensional vegetation structure. A more even distribution of  
213 biomass among species or growth forms usually indicates that structural material is not dominated by a single  
214 morphological unit, but is more likely composed of vegetation elements differing in height, form, and spatial  
215 configuration.

216 In our experimental plots, this biomass-weighted gradient was consistent with multiple independent observations.  
217 The water-level gradient drove a transition from a monodominant herbaceous community to a multispecies herbaceous  
218 community and then to a mixed herbaceous-woody community. This process was accompanied by consistent  
219 structural changes in field observations, plot photographs, digital surface profiles, and the predefined low-, medium-,  
220 and high-VSC groups. Therefore, within the specific experimental system of this study, the biomass-weighted  
221 Shannon index provides a reasonable external ecological reference for evaluating the sensitivity of different structural  
222 metrics to continuous changes in community structure.

223 Importantly, the evaluation of VSRE in this study does not rely solely on this correlation analysis. We first  
224 compared structural metrics across low-, medium-, and high-complexity communities formed in the water-level-  
225 controlled experiment at different point cloud densities. The results showed that conventional metrics were prone to  
226 misclassifying medium-complexity communities in coastal wetlands, whereas VSRE distinguished different VSC  
227 gradients more consistently. We then used the biomass-weighted Shannon index as an independent continuous  
228 gradient to further test each metric's responsiveness to continuous variation in community structure. In the revised  
229 manuscript, we will more clearly distinguish these two components of the validation framework: the former assesses  
230 each metric's ability to discriminate discrete structural gradients, whereas the latter provides a supplementary test of  
231 sensitivity to continuous ecological gradients.

232 We also agree with you that this analysis should not be presented as the sole or decisive evidence for the  
233 superiority of VSRE. Therefore, in the revised manuscript, we will further soften the relevant wording and avoid  
234 referring to the Shannon index as an objective VSC measure or a direct measure of VSC. Instead, we will describe it  
235 as biomass-weighted community heterogeneity or as an independent continuous ecological gradient associated with  
236 structural differentiation in this experimental system. We will also clearly state that this analysis provides only  
237 supplementary evidence for the ecological relevance and continuous-gradient sensitivity of VSRE, rather than using  
238 biodiversity as a universal validation criterion for VSC.

239 **Revised text and figures:**

240 *Main text: Line 719-727*

241 Because the initial VSC grouping of the secondary plots was based primarily on predefined vegetation community  
242 composition, structural characteristics, and expert field assessment, we further calculated a biomass-weighted  
243 Shannon diversity index as an independent and continuous reference for the degree of structural differentiation in each  
244 secondary plot. Biomass, rather than individual abundance, was used for weighting because the plots contained both  
245 herbaceous and woody plants, which differed markedly in individual abundance, body size, and contribution to three-  
246 dimensional spatial structure. Compared with diversity indices based on individual abundance, the biomass-weighted  
247 approach better reflects the relative contributions of different species and growth forms to the material basis of  
248 vegetation structure, thereby reducing bias introduced by the extremely high abundance of herbaceous individuals  
249 when characterizing community structure (Cousins, 1991).

250 **Comment 5:** *Third, the overall writing of the manuscript requires improvement. The current version attempts to*  
251 *integrate a wide range of content, which reduces its focus, while several important components lack sufficient detail.*  
252 *For instance, the classification of coastal vegetation types is itself a substantial task, yet it is only briefly described.*  
253 *A similar issue arises with the nationwide VSC mapping, where methodological and implementation details are limited.*  
254 *I therefore suggest that the authors consider dividing the work into two separate papers: one focusing on the technical*  
255 *development and validation of the proposed VSC metric, and another dedicated to its application in national-scale*  
256 *mapping.*

257 **Response:** We are very grateful for your important suggestion. We agree that integrating several components,  
258 including metric development, vegetation classification, and national-scale mapping, may have reduced the focus of  
259 the current manuscript. We also agree that the methodological details of vegetation classification and national-scale  
260 VSC mapping were not sufficiently presented in the main text. We fully understand the suggestion that the manuscript  
261 could be divided into two separate papers, as this was also an option that we carefully considered during the early  
262 stage of the study design.

263 At the same time, we would like to clarify the role of vegetation classification and national-scale mapping in this  
264 work. Vegetation classification is not an independent research objective in this study. Instead, it serves as an  
265 intermediate layer that links structural metrics with ecological interpretation, allowing us to examine whether VSRE  
266 can distinguish structural differences associated with different vegetation types at the species or community level. In  
267 this sense, the main role of this component is to support functional validation and ecological interpretation of VSRE,  
268 rather than to constitute the core technical contribution of the manuscript.

269 We acknowledge that the original description of the vegetation classification method was relatively brief, which  
270 may have contributed to misunderstanding regarding its role. The full workflow of this method has been systematically  
271 described in a recently published independent study. Because that study had not been formally published at the time  
272 of initial submission, we retained several classification steps in the Methods section to provide necessary information  
273 for interested readers. Since the independent study was published with this classification dataset, which is publicly  
274 accessible, on February 20, 2026 (Qi et al., 2026), we will remove the original **Section 1.2.5** and retain only the  
275 necessary brief description in the revised manuscript and refer readers to that publication for details, thereby reducing  
276 interference with the main storyline and more clearly emphasizing the auxiliary role of the classification component.

277 After further consideration, we still believe the national-scale mapping component should be retained for two  
278 main reasons. First, from a conceptual perspective, this study develops and validates a structural metric tailored to  
279 coastal vegetation. After plot-level validation, presenting national-scale mapping results provides a direct extension  
280 from local validation to large-scale ecological applications. This extension demonstrates the practical value of VSRE  
281 and provides a foundation for future studies of the spatial structure and patterns of coastal vegetation. Second, from  
282 the perspective of application and data sharing, the national-scale implementation has a clear and reliable basis. We  
283 collected a large number of standard field LiDAR samples with precise geographic coordinates, which provides solid  
284 support for large-scale extrapolation. In addition, the release of the AEF embedding dataset enabled us to efficiently  
285 complete the inversion and achieve high accuracy without reprocessing large volumes of raw multi-source remote  
286 sensing data. In this context, generating and publicly sharing a national-scale data product is also consistent with  
287 ESSD's emphasis on data accessibility, reusability, and broad scientific utility.

288 At the same time, we accept your criticism that the current narrative is not sufficiently focused, and we will make  
289 substantial revisions accordingly. Specifically, we will strengthen the main storyline of the manuscript to more clearly  
290 focus on the development, validation, and first national-scale application of VSRE in the coastal zone of China. For  
291 the sections on vegetation classification and national mapping, we will shorten non-essential descriptions in the main  
292 text and move implementation details, parameter settings, model selection procedures, and supplementary results to  
293 the Methods and Supplementary Materials. This revision will prevent these supporting components from  
294 overshadowing the main theme. We will also more clearly distinguish three levels of content in the Introduction,  
295 Methods, and Discussion: the theoretical construction of VSRE, validation using fixed plots and field LiDAR samples,  
296 and national-scale wall-to-wall mapping based on AEF data. Through these revisions, we aim to ensure that vegetation  
297 classification and national mapping serve the validation and application logic of VSRE more clearly, rather than  
298 appearing as independent modules parallel to the main theme.

299

300 **Comment 6:** *Title: The current title doesn't seem like a data paper.*

301 **Response:** Thank you for this helpful suggestion. In the revised manuscript, we have changed the title  
302 to: "ChinaTidalVSC: a 10 m wall-to-wall dataset of vegetation structural complexity in China's tidal wetlands derived  
303 from LiDAR-based relative entropy and AlphaEarth Foundation data".

304

305 **Comment 7:** *Line 38: "the their". Typo.*

306 **Response:** Thank you for your suggestion. We have revised this error.

307

308 **Comment 8:** *Line 58-59: Numerous studies have already addressed this question in terrestrial ecosystems. Therefore,*  
309 *the discussion should be more focused on the functional and structural characteristics of coastal ecosystems.*

310 **Response:** Thank you for this valuable suggestion. In the revised manuscript, we have strengthened this discussion  
311 and improved the transition from the terrestrial to the coastal ecosystem context to clarify the logic.

312 **Revised text:**

313 **Main text:** [Line 63-98](#)

314 However, most of these LiDAR-derived VSC metrics were developed and validated primarily in terrestrial ecosystems,  
315 especially forests (Coverdale and Davies, 2023). Whether they can reliably capture structural complexity in coastal  
316 wetlands remains unclear because the structural organization, environmental background, and observation conditions  
317 of coastal vegetation differ fundamentally from those of forest systems. There, vegetation is periodically inundated by  
318 tides and rooted in soft, muddy, or organic substrates with high water and salt content (He et al., 2025; Yando et al.,  
319 2023). It supports vegetation assemblages that often comprise open-canopy succulents, graminoids, and mangroves  
320 (Lafond-Hudson and Sulman, 2023). Relative to forests, these communities are typically shorter and more structurally  
321 compressed. The close juxtaposition of herbaceous and woody growth forms within a narrow vertical range can cause  
322 strong overlap among structural elements, reducing the ability of conventional VSC metrics to resolve subtle  
323 differences in three-dimensional organization (Taddeo et al., 2019). Tidal water surfaces further obscure low-stature  
324 vegetation and near-ground structure, increasing the likelihood of missing or unstable LiDAR returns (Moffett et al.,  
325 2015). These complications propagate from local measurements to regional inference: spaceborne optical and lidar  
326 observations cannot be consistently matched to low-tide conditions across repeated overpasses, and the fine-scale  
327 mosaics of vegetation, exposed mudflats, and water often result in severe mixed-pixel effects. Together, these features  
328 make VSC retrieval in coastal wetlands especially challenging in terms of sensitivity, robustness, and regional  
329 scalability.

330 An equally important limitation is the severe scarcity of VSC data and supporting covariates suitable for model  
331 development, accuracy validation, and spatial extrapolation in coastal ecosystems (Weilhoefer, 2011). First, coastal  
332 wetlands exhibit rapid dynamics, limited field accessibility, and extensive spatial distributions (Qi et al., 2026). These  
333 features increase acquisition costs and make it difficult to obtain medium- to high-density point clouds that can resolve  
334 vegetation's three-dimensional structure at ecologically meaningful scales, especially in publicly available datasets  
335 (e.g., OpenTopography, NEON, and NOAA Digital Coast) (Krishnan et al., 2011; Keller et al., 2008; Dobson, 1995).  
336 Second, many satellite remote sensing products that could potentially support VSC quantification were originally  
337 developed for terrestrial ecosystems, and their applicability in intertidal environments remains limited or insufficiently  
338 validated. This limitation is particularly relevant for spaceborne LiDAR products such as GEDI and ICESat-2, which  
339 still involve substantial uncertainty when applied to low-stature, open wetland vegetation strongly affected by tidal  
340 dynamics (Yu et al., 2026). Finally, environmental covariates used for large-scale VSC modeling and spatial  
341 extrapolation, including WorldClim and topographic variables (Fick and Hijmans, 2017; Kulp and Strauss, 2018),  
342 often face additional constraints in coastal areas, including insufficient spatial resolution, incomplete nearshore  
343 coverage, and large errors near land-sea boundaries. Together, these limitations have resulted in a lack of coastal-  
344 specific quantitative studies on VSC and of quality-controlled, standardized VSC products that can be used directly  
345 for modeling, validation, and regional extrapolation.

346  
347 **Comment 9:** *Line 68-71: What are the unique challenges associated with quantifying canopy structural*  
348 *complexity in coastal ecosystems? It would be helpful to include one or two sentences to clarify this point.*

349 **Response:** Thank you for pointing this out. In the revised manuscript, we have revised the background section to  
350 strengthen this explanation. Specifically, we now clarify these challenges from three perspectives: the technical

351 constraints imposed by the environmental conditions of coastal wetlands, the difficulties arising from the distinctive  
352 structural characteristics of coastal vegetation, and the additional challenges associated with large-scale spatial  
353 extrapolation. The revised text can be found in **response to comment 8**.

354  
355 **Comment 10:** *Line 72-90: This content belongs in the Methods section. In the Introduction, you may briefly*  
356 *summarize the data and overall approach of the study, but detailed procedural steps should not be included.*

357 **Response:** Thank you for this helpful suggestion. In the revised manuscript, we have rewritten this section and moved  
358 the technical details to the Methods section.

359 **Revised text:**

360 *Main text: Line 99-114*

361 Based on the concept of relative entropy (RE, also known as the Kullback–Leibler divergence) (Cover and Thomas,  
362 1991), this study developed a LiDAR point-cloud-derived VSC index, termed vegetation structure relative entropy  
363 (VSRE), to characterize heterogeneity in three-dimensional spatial configuration. Using high-precision UAV LiDAR  
364 observations and annual vegetation biomass survey data from 18 subplots (60 m × 60 m) at the largest water-level-  
365 controlled field experimental site worldwide, located on Chongming Island, Shanghai, China (**Fig. 1**), we  
366 systematically tested VSRE and compared its performance with several conventional VSC metrics widely used in  
367 terrestrial ecosystems. Specifically, we evaluated the effectiveness and robustness of these metrics in quantifying VSC  
368 across typical coastal wetland vegetation scenarios, continuous complexity gradients, and different point cloud  
369 densities. We then applied VSRE to a high-density LiDAR dataset from 1,337 coastal vegetation sites spanning  
370 China's 18,400 km coastline. We combined the results with corresponding 2022 vegetation-type data to characterize  
371 VSC variation across typical natural vegetation communities in coastal wetlands of China. Finally, using the Alpha  
372 Earth Foundation (AEF) dataset and a multilayer perceptron (MLP) model, we generated a seamless 10 m spatial map  
373 of VSRE along the coast of China with high predictive accuracy ( $R^2 = 0.96$ ).

374  
375 **Comment 11:** *Line 92: To be honest, this section is somewhat disorganized. The descriptions of fixed experimental*  
376 *plot data and drone-based LiDAR data should be clearly separated. At present, key information regarding the drone*  
377 *LiDAR data used for national mapping is missing. For example, the manuscript does not specify where these plots are*  
378 *located or what their spatial extent is.*

379 **Response:** We apologize for not providing a sufficiently detailed description of the fixed-plot and field-plot data  
380 collection in the original manuscript. In the revised manuscript, we have separated the two types of data collection  
381 into Sections 1.2.1 and 1.2.2. Specifically, we have added consistent descriptions of the UAV and LiDAR acquisition  
382 settings in both sections. We have also included the spatial coordinates of the fixed plots in the Methods section.  
383 Because the field plots are numerous, listing all field coordinates in the main text would be impractical. Therefore,  
384 detailed sample locations for the field plots will be provided as an SHP vector file in the public data repository.

385 **Revised text:**

386 *Main text: Line 126-168*

387 **1.2.1 LiDAR data collection in the fixed plot**

388 This study was based on the world's largest water-level-controlled wetland experimental plot, the Dongtan Ecosystem  
389 Experimental Plot (121.94°E, 31.52°N; Fig. 1). Established in 2018, this fixed plot has allowed vegetation to grow  
390 under natural coastal wetland conditions to date. The experimental setup includes three distinct water levels (-30 cm,  
391 0 cm, and +30 cm), randomly distributed across a 130-hectare coastal wetland. The site was divided into 18 secondary  
392 plots, each measuring 60 × 60 meters, with two open-top chambers installed within each plot. Under these conditions,  
393 the vegetation communities developed distinct structural types: at the +30 cm tidal level, the community is dominated  
394 almost exclusively by *P. australis*; at the 0 cm level, diverse herbaceous species form mixed communities; and at the  
395 -30 cm level, mixed herbaceous species coexist with woody plants resembling mangrove structures. These naturally  
396 formed communities with contrasting vegetation structures provided ideal experimental conditions for our study.  
397 We conducted LiDAR surveys over the fixed plot using a DJI Matrice 300 RTK drone equipped with a DJI Zenmuse  
398 L1 LiDAR sensor. Each flight mission covered the entire experimental site to ensure accurate spatial matching. For  
399 UAV acquisition, the return mode was set to 3 returns to improve the point cloud's ability to capture vegetation  
400 elements at different vertical positions. Point cloud densities were controlled by adjusting flight height and overlap  
401 rate, targeting approximate densities of 50, 100, 250, 500, 1000, 1500, and 2000 points m<sup>-2</sup>. Datasets collected at 50  
402 and 100 points m<sup>-2</sup> were discarded due to excessive absorption by water surfaces (Supplementary Fig 1). Raw LiDAR  
403 data were processed in DJI Terra for stitching and denoising, and individual secondary plots were cropped to match  
404 the spatial extent of the ground survey plots. During cropping, we prioritized minimizing chamber inclusion while  
405 preserving all relevant vegetation features (specific cropping boundaries are shown in Fig. 1b).

### 406 1.2.2 LiDAR data collection in the field sites

407 We conducted extensive field surveys along the coast of mainland China from 2022 to 2023, spanning 21.5749°N-  
408 40.9235°N (Fig. 1a). All surveys used the same UAV and LiDAR system, namely a DJI Matrice 300 RTK UAV  
409 equipped with a DJI Zenmuse L1 LiDAR sensor. A total of 81 LiDAR scanning missions, accompanied by  
410 synchronous optical photography, were conducted in major coastal vegetation hotspots. The LiDAR scans were  
411 acquired in three-return mode, and the expected point cloud density was maintained at >500 pt m<sup>-2</sup> by adjusting flight  
412 altitude, flight speed, and side overlap. All data were collected under good visibility and low tide, when vegetation  
413 was fully exposed, to ensure simultaneous acquisition of high-quality optical imagery with a spatial resolution of  
414 approximately 0.5 m. These optical images supported subsequent accurate point-cloud cropping and vegetation type  
415 identification. In addition, we conducted 30 supplementary forest LiDAR surveys in Yunhe City, Zhejiang Province  
416 (Supplementary table S1), to compare potential differences in point-cloud structural characteristics across  
417 ecosystems and further assess the scalability of VSRE.

418 During data preprocessing, we further cropped the stitched raw point clouds. Based on vegetation patches and  
419 corresponding species information identified from high-resolution optical imagery, we extracted 1,337 25×25 m  
420 subsamples from the 81 stitched LiDAR datasets. Each subsample was associated with accurate latitude and longitude  
421 coordinates and vegetation type information, and adjacent subsamples were separated by at least 25 m. The point  
422 cloud density of the coastal vegetation subsamples ultimately ranged from 20.89 to 4,364.33 pt m<sup>-2</sup>, with a mean value  
423 of 790.22 pt m<sup>-2</sup>. The same cropping procedure was applied to the forest plots, but only one subsample was retained  
424 for each plot. The final point cloud density of the forest subsamples ranged from 142.04 to 1,271.73 points m<sup>-2</sup>.

425  
426  
427  
428  
429  
430  
431  
432  
433  
434  
435  
436  
437  
438  
439  
440  
441  
442  
443  
444  
445  
446  
447  
448  
449  
450  
451  
452  
453  
454  
455  
456  
457

**Comment 12:** *Line 93: This sentence is misleading, as it suggests that the entire study was conducted at a single site. In fact, the site was only used for method validation.*

**Response:** Thank you for this helpful suggestion. We have revised the sentence to avoid any potential misunderstanding. The revised text is provided in **response to comment 11**.

**Comment 13:** *Line 104-105: Beyond point density, the vertical penetration capability of the LiDAR sensor is critical for accurately measuring canopy structural complexity. To my knowledge, the DJI L1 sensor has limited ability to penetrate dense canopies. It would therefore be helpful to include a vertical profile visualization to illustrate this limitation, allowing readers to better understand the characteristics and potential constraints of the data.*

**Response:** We appreciate you raising this valuable point. We agree that, in addition to point cloud density, the vertical penetration capability of LiDAR sensors, including the ability to capture returns from the lower canopy and ground surface, is also critical for assessing vegetation structural complexity. In airborne LiDAR surveys, this sampling characteristic can be influenced by multiple factors, including canopy openness, scan geometry, return-recording capability, and flight configuration.

In this study, all surveys were conducted using the same DJI L1 sensor and a consistent acquisition framework. Therefore, sensor-specific properties, such as return-recording capability and scan configuration, were not experimental variables that differed among samples. By contrast, the flight parameters adjusted during data acquisition, including flight altitude, flight speed, and overlap, mainly affected the final point cloud density. We therefore used point cloud density as the primary descriptor of acquisition intensity in our analysis. Nevertheless, we recognize that acquisition and sensor parameters for vertical sampling may be useful to readers with expertise in LiDAR data collection. We have therefore added descriptions of these parameters to the Methods section for reference.

It is also important to note that the target ecosystem of this study is coastal wetlands rather than closed-canopy forests. Most coastal wetland communities in our dataset are characterized by relatively low vegetation height, open canopy structure, and limited vertical overlap among plant elements. Under these conditions, LiDAR pulses can generally sample the lower canopy and, in many cases, the ground surface, especially when point cloud density is high. Therefore, in our study system, point cloud density represents the main source of variation in sampling intensity, whereas penetration limitations are less pronounced than in dense forest canopies. To illustrate this point more clearly, we have added representative vertical-profile visualizations for several coastal vegetation types and discuss this sensor characteristic and its limitations in the revised manuscript. We also clarify that VSRE is most directly applicable to relatively open coastal wetland canopies and should be applied with caution to dense, closed-canopy systems. The revised text is provided in **response to comment 11**.

**Revised Figures :**

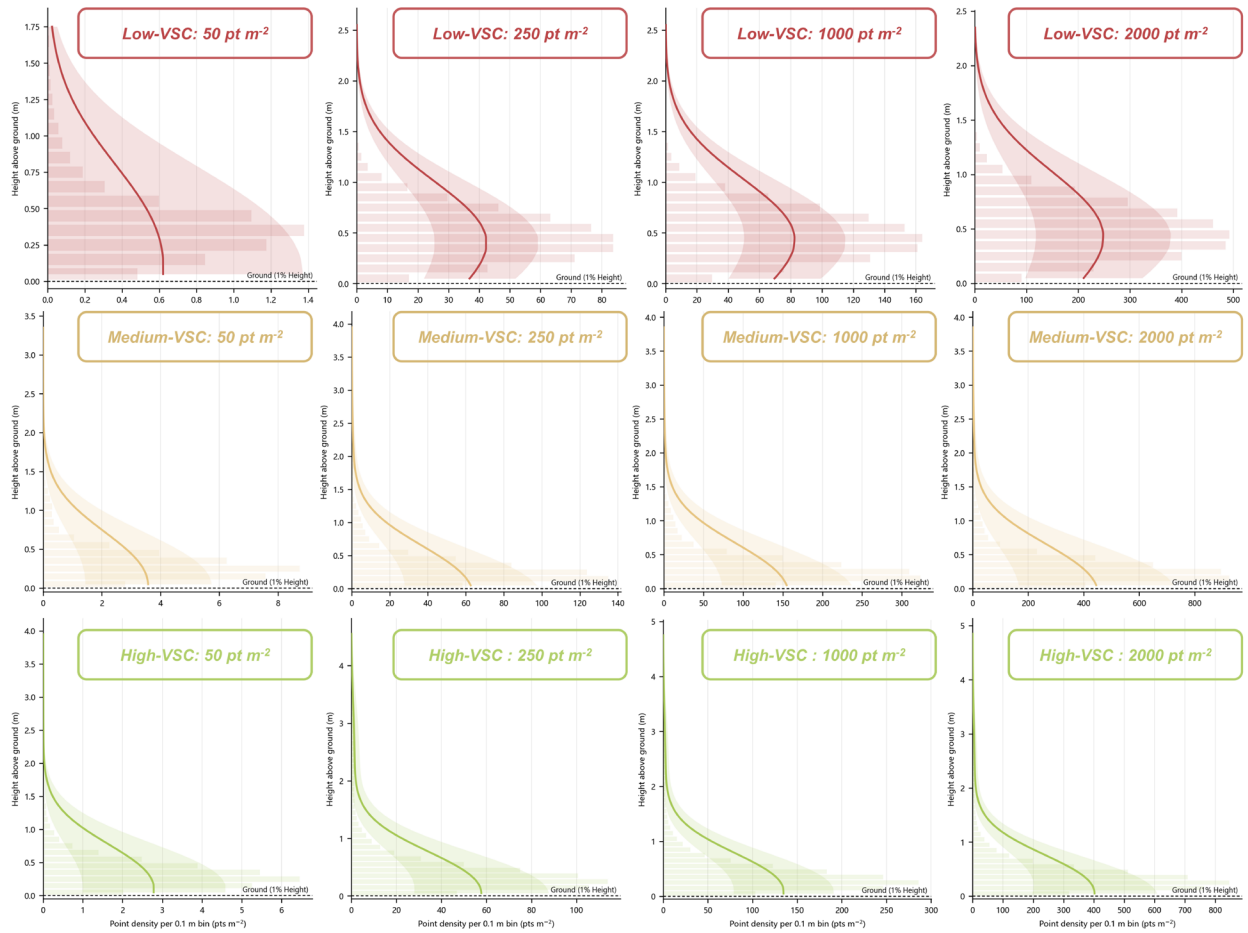

458

459 **Fig 1 | Vertical point-density profiles of fixed-plot samples across VSC groups and target LiDAR point-**  
 460 **cloud densities.** Vertical point-density profiles for fixed-plot samples of  $25 \times 25 \text{ m}^2$  grouped by vegetation  
 461 structural complexity (VSC) and target point-cloud density. Rows represent low-, medium-, and high-VSC  
 462 groups, and columns represent target point-cloud densities of 50, 250, 1000, and  $2000 \text{ pt m}^{-2}$ . In each panel,  
 463 horizontal bars show the mean point density within 0.1 m vertical height bins, the solid curve shows the  
 464 Gaussian-smoothed mean profile, and the shaded envelope indicates variability among samples. Heights were  
 465 normalized relative to local ground, defined as the 1st percentile of point height and indicated by the black  
 466 dashed line. The x-axis shows point density per 0.1 m height bin, and the y-axis shows height above ground.

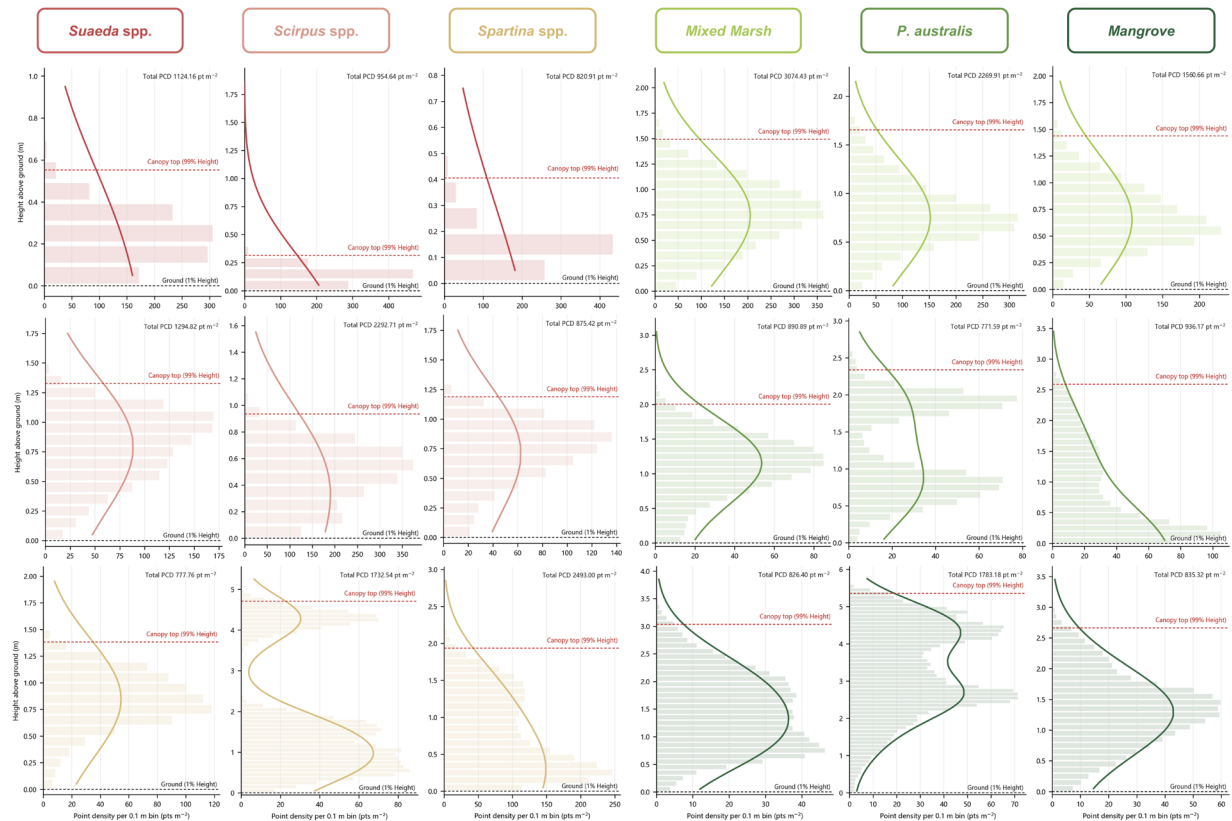

467  
 468 **Fig. 2 | Species-specific vertical point-density profiles of field-collected coastal wetland samples.** Vertical  
 469 point-density profiles of individual field-collected 25×25 m<sup>2</sup> LAS samples across major coastal wetland  
 470 vegetation types, including Suaeda spp., Scirpus spp., Spartina spp., mixed marsh, Phragmites australis, and  
 471 mangrove. Each panel represents one field sample. Horizontal bars show point density within 0.1 m vertical  
 472 height bins, and the solid curve shows the smoothed vertical distribution of point density. The PCD values in the  
 473 upper-right corner indicate the total point-cloud density for each sample, calculated as the total point count  
 474 divided by the plot area. Heights were normalized using the 1st percentile of point height as local ground,  
 475 indicated by the black dashed line. The red dashed line marks canopy top height, defined as the 99th percentile  
 476 of normalized point height.

477  
 478 **Comment 14:** Line 14: “numerous” It would be better to provide a specific number.

479 **Response:** Thank you for this helpful suggestion. We have revised the description to include the exact number of  
 480 samples.

481 **Revised text:**

482 Main text: Line 151-152

483 A total of 81 LiDAR scanning missions, accompanied by synchronous optical photography, were conducted in major  
 484 coastal vegetation hotspots.

485

486 **Comment 15:** *Line 119: This represents a very wide range of point densities. Additional information is needed to*  
487 *justify the experimental design and the selection of point density levels.*

488 **Response:** We thank you for this comment. We agree that reporting a broad range of point cloud densities without  
489 explaining their source and selection logic could raise reasonable concerns about the experimental design.

490 First, we clarify that this broad range mainly reflects the overall distribution of raw data from the nationwide  
491 field sampling campaign, and does not mean that all density levels were used equally in the vegetation structural  
492 complexity analysis. In the nationwide field survey, the raw point cloud density ranged from 20.89 to 4364.33 pt m  
493 m<sup>-2</sup>, with a mean value of 790.22 pt m m<sup>-2</sup>. This range reflects raw sampling conditions across different regions,  
494 vegetation types, and land-cover backgrounds, rather than a homogeneous dataset used as the basis for the final  
495 structural analysis.

496 Second, we retained this overall range to represent the variability of real field acquisition conditions transparently.  
497 However, the data used in the actual analysis were further quality controlled. For the core analysis of vegetation  
498 structural complexity, we focused on samples with sufficient information to characterize three-dimensional vegetation  
499 structure effectively (PCD > 250 pt m<sup>-2</sup>). Low-density samples (PCD = 20-250 pt m<sup>-2</sup>) were mainly found in  
500 structurally simple settings, such as bare mudflats. In other words, the reported wide density range should be  
501 understood as the overall coverage of the raw sampling background, rather than as evidence that all effective  
502 vegetation samples used for structural comparison spanned this range without quality constraints.

503 More importantly, our results show that VSRE is robust to variation in point cloud density. Therefore, a wide  
504 range of point cloud densities does not necessarily imply systematic distortion of the results. Methodologically, VSRE  
505 does not directly depend on the raw number of points within a single layer. Instead, it first normalizes voxel  
506 distributions within sliding windows to reduce the influence of local anomalies and overall point cloud density  
507 variation, and then compares the relative entropies of these normalized distributions. Empirically, we evaluated the  
508 discriminatory ability of VSRE at different PCD levels and further tested its stability under a mixed-PCD scenario.  
509 The results showed that VSRE could consistently distinguish between different complexity groups, even when point  
510 cloud density varied or when samples with different densities were combined, whereas several conventional metrics  
511 showed more pronounced misclassification or density sensitivity under these conditions.

512 Therefore, we reported this point cloud density range for two main reasons: to reflect objective variation in data  
513 acquisition under real field conditions, and to test the applicability of VSRE under non-ideal and non-uniform  
514 sampling conditions. Our results indicate that VSRE can maintain stable performance under relatively flexible  
515 conditions, provided that individual samples meet a usable density threshold or that sufficient replicated samples are  
516 available in mixed-PCD scenarios. To avoid misunderstanding, we will clarify in the revised manuscript that this  
517 broad range primarily reflects the raw field data distribution, whereas the data used for vegetation structural analysis  
518 were subject to quality control. We will also clarify the main sources of low-density samples and strengthen the  
519 explanation of PCD selection criteria and the applicable scope of VSRE in the Methods and Results sections.

520 **Revised text :**

521 *Main text: Line 161-178*

522 During data preprocessing, we further cropped the stitched raw point clouds. Based on vegetation patches and  
523 corresponding species information identified from high-resolution optical imagery, we extracted 1,337 25×25 m  
524 subsamples from the 81 stitched LiDAR datasets. Each subsample was associated with accurate latitude and longitude  
525 coordinates and vegetation type information, and adjacent subsamples were separated by at least 25 m. The point  
526 cloud density of the coastal vegetation subsamples ultimately ranged from 20.89 to 4,364.33 pt m<sup>-2</sup>, with a mean value  
527 of 790.22 pt m<sup>-2</sup>. The same cropping procedure was applied to the forest plots, but only one subsample was retained  
528 for each plot. The final point cloud density of the forest subsamples ranged from 142.04 to 1,271.73 points m<sup>-2</sup>.

529  
530  
531 **Comment 16:** *Line 141: Did you measure tree height manually in the field? If so, what is the purpose of using LiDAR-*  
532 *segmented individual trees?*

533 **Response:** We thank you for this question. In this study, we did not conduct manual height measurements for all trees.  
534 The main reason is that the fixed plots contained numerous soil-monitoring instruments, and most trees were  
535 distributed within them. Manual height measurement for each tree would not only have been technically challenging,  
536 but could also have disturbed the plots and related monitoring facilities. Therefore, we used high-density UAV LiDAR  
537 data, combined with an individual-tree segmentation algorithm, to extract trees and estimate tree heights within the  
538 plots in a non-destructive manner. We also measured the location, height, and DBH of 7 trees at the edge of the plots  
539 and compared them with vegetation parameters calculated after individual tree segmentation. The results showed that  
540 the errors were extremely small (nRMSE<sub>CH</sub> = 5.7%, nRMSE<sub>DBH</sub> = 2.4%).

541 Specifically, we segmented individual trees in the fixed plots using the canopy height model (CHM) in  
542 LiDAR360, assigned each segmented tree to its corresponding plot, and then extracted structural parameters such as  
543 tree height. Based on these results, we estimated tree biomass by combining tree species information with allometric  
544 equations. Such an approach is widely used in forest biomass surveys, and the allometric equations and parameters  
545 adopted here are available for common tree species in our plots, which were dominated by Chinese tallow trees. We  
546 therefore consider this method to provide reliable support for extracting tree height within the plots.

547 In the revised manuscript, we will further clarify that comprehensive manual height measurements were not  
548 conducted for trees within the sample plots. Instead, tree height information was derived from high-density LiDAR  
549 point clouds and individual-tree segmentation results. We will also explain the rationale for adopting this method,  
550 namely to minimize disturbance to the fixed plots while maintaining reliable height estimation.

551 **Revised text:**

552 *Main text: Line 194-206*

553 For woody plants growing in the center of the plots, considering the presence of sophisticated equipment monitoring  
554 soil respiration and vegetation carbon flux, we refrained from entering the plots for measurement to avoid interference  
555 and damage. Therefore, based on the highest point cloud density (2000 pt m<sup>-2</sup>), we used the canopy height model  
556 (CHM) in LiDAR 360 software to segment individual trees within the fixed plots and assigned each segmented tree  
557 to its corresponding secondary plot (Fischer et al., 2019). The diameter at breast height (DBH) and crown height (CH)  
558 were recorded for each tree extracted using the segmentation algorithm. We measured the location, height, and DBH

559 of 7 trees at the edge of the plots and compared them with vegetation parameters calculated after individual tree  
560 segmentation. The results showed that the errors were extremely small ( $nRMSE_{CH} = 5.7\%$ ,  $nRMSE_{DBH} = 2.4\%$ ).  
561 Furthermore, we identified tree species (mainly *Sapium sebiferum*) using UAV optical imagery and selected a  
562 matching allometric growth model to estimate biomass. Subsequently, we used a species-specific binary allometric  
563 growth model based on DBH and CH (Jucker et al., 2022) to calculate the total tree biomass of each secondary forest  
564 plot.

565  
566 **Comment 17:** *Line 155: I am not convinced that this index effectively quantifies canopy structural complexity. Rather,*  
567 *it appears to primarily capture the dissimilarity in vertical canopy distribution. Please see my general comment.*

568 **Response:** We thank you for this comment. We understand the concern regarding whether VSRE can effectively  
569 characterize canopy structural complexity. In our view, the key issue is how the conceptual scope of VSC is defined.  
570 From an ecological perspective, structural complexity is generally understood as the spatial organization of structural  
571 elements and the degree of heterogeneity in that organization. It therefore includes not only the presence or abundance  
572 of structural elements, but also their arrangement and variation in three-dimensional space. VSRE was developed  
573 based on this understanding. By voxelizing local point clouds into three-dimensional distribution functions and  
574 comparing differences in these functions among spatial locations, VSRE quantifies configurational differences in the  
575 spatial arrangement of structural elements. Therefore, VSRE corresponds to the dimension of structural complexity  
576 related to spatial configurational heterogeneity, and provides a direct quantitative expression of this dimension rather  
577 than an indirect proxy for other structural metrics.

578 We agree that VSRE uses information on vertical point distributions during its calculation and is therefore  
579 sensitive to vertical structural differences. However, interpreting VSRE solely as a measure of vertical distribution  
580 differences would be incomplete. VSRE does not describe the vertical distribution at a single location. Instead, it  
581 compares three-dimensional distribution patterns across multiple local regions using a sliding-window framework. In  
582 other words, this metric evaluates whether the spatial organization of structural elements is consistent among local  
583 regions, rather than describing only the shape of the vertical profile at a given location. Thus, even if two regions have  
584 similar vertical layering, VSRE can still distinguish them when their three-dimensional configurational patterns differ.

585 In our **response to the general comment 2**, we provide a more detailed explanation of the relationship between  
586 VSRE and the concept of structural complexity, the specific structural dimension quantified by VSRE, and the  
587 differences between VSRE and conventional metrics. That explanation is consistent with the response provided here.  
588 We hope these revisions clarify that VSRE is not intended merely to describe differences in vertical distribution, but  
589 rather to quantify heterogeneity in the three-dimensional configuration of local vegetation structures.

590  
591 **Comment 18:** *Fig. 2: This figure is not an effective illustration. It does not clearly convey how the metric is designed*  
592 *or calculated, and instead only shows a set of voxels without sufficient explanation.*

593 **Response:** Thank you for this helpful suggestion. We have revised the technical workflow figure to provide a more  
594 detailed and transparent illustration of the VSRE calculation process. The revised figure now includes the specific  
595 processing steps and procedures, thereby addressing the missing information in the original conceptual illustration.

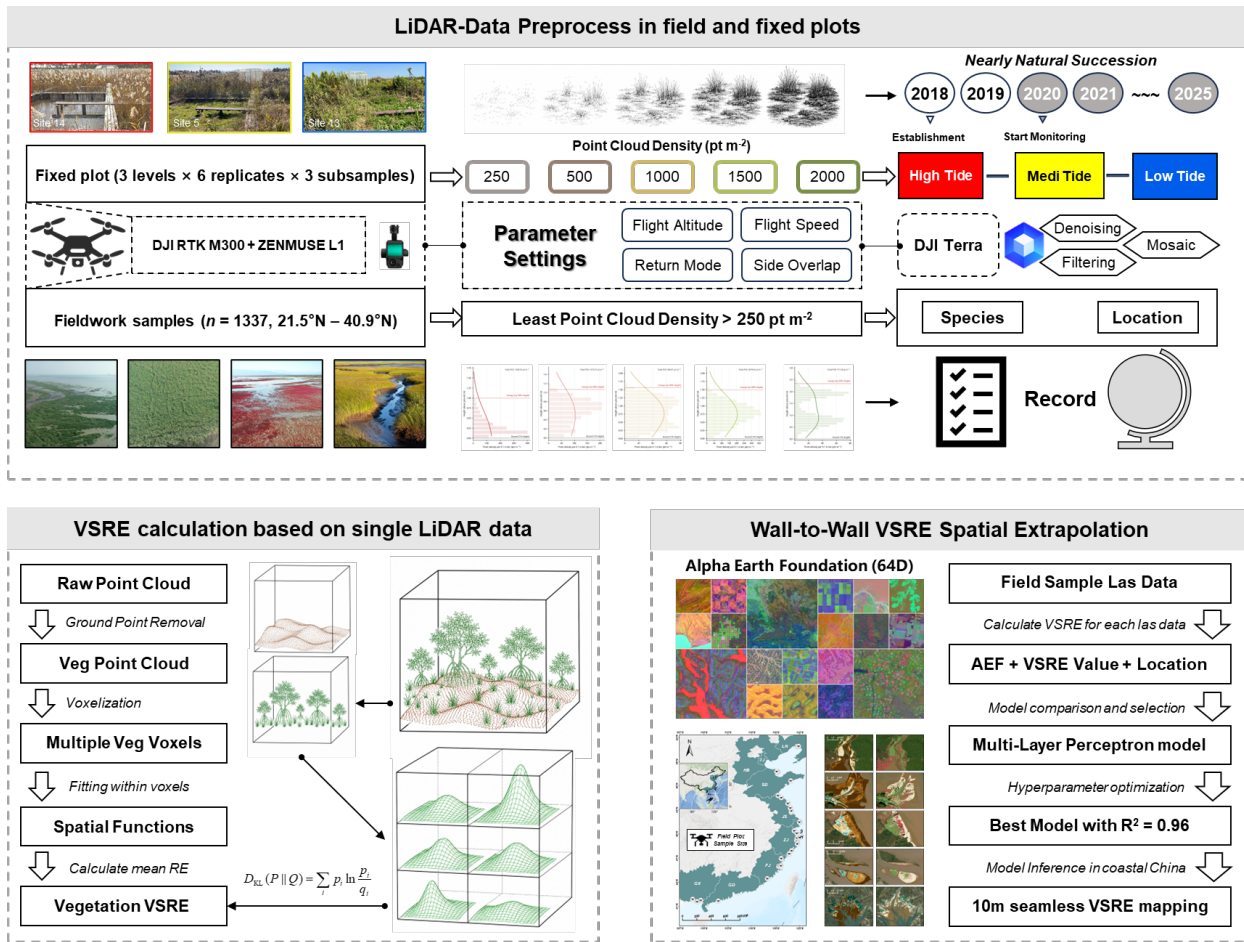

597  
598 **Fig. 3 | The Overall workflow of this study.**

599  
600 **Comment 19:** Line 233: Five? But you only mentioned four here.

601 **Response:** We thank you for the careful reading. We would like to clarify that the phrase “All five structural metrics  
602 were calculated for the same LiDAR samples and spatial extents as VSRE. By comparing VSRE with metrics  
603 emphasizing horizontal structure (**canopy cover**), vertical structure (**mean vegetation height** and **FHD**), and  
604 integrated canopy structure (**rugosity** and **canopy entropy**), this analysis provides a systematic evaluation of whether  
605 VSRE captures structural information beyond that represented by conventional vegetation structural complexity  
606 indices, particularly in the context of coastal saltmarsh ecosystems.” in the original text refers to five conventional  
607 structural metrics, namely mean

- 608 ● mean vegetation height
- 609 ● canopy cover
- 610 ● FHD (foliage height diversity)
- 611 ● canopy rugosity
- 612 ● canopy entropy

613 VSRE is the new metric proposed in this study and was compared against these five existing metrics. Therefore, the  
614 intended comparison was between five conventional structural metrics and VSRE. The latter part of the original  
615 sentence was intended to describe the structural dimensions represented by these five conventional metrics:

- 616 ➤ horizontal structure: canopy cover (1)
- 617 ➤ vertical structure: mean vegetation height and FHD (2)
- 618 ➤ integrated canopy structure: rugosity and canopy entropy (2)

619 Together, these correspond to five conventional structural metrics. We recognize that the original wording may not  
620 have been sufficiently clear. In the revised manuscript, we will explicitly state "five conventional structural metrics"  
621 and list these metrics where appropriate to avoid ambiguity or the mistaken inclusion of VSRE in this count.

622  
623 **Comment 20:** *Line 239-306: This is an interesting study; however, the manuscript does not allocate sufficient space*  
624 *to adequately present the results. Key outcomes, such as classification and mapping accuracy, are only mentioned in*  
625 *the Methods section, which is inappropriate. Please refer to my general comments for further details.*

626 **Response:** We appreciate you raising this important point. We agree that the presentation of this section in the original  
627 manuscript was not ideal. In particular, the key results of vegetation classification and national-scale mapping were  
628 described primarily in the Methods section rather than clearly summarized in the Results section. This organization  
629 may have weakened the clarity of the manuscript structure and made it difficult for readers to understand the role of  
630 this component within the overall study.

631 We want to clarify that this component is not a core research objective in itself, but rather a supporting element  
632 for the national-scale application of VSRE. Specifically, vegetation classification provides essential background  
633 information for subsequent structural interpretation and ecological validation, whereas national-scale mapping is  
634 included not to develop an independent classification study, but to demonstrate the applicability of VSRE in real-  
635 world, large-scale settings. For this reason, we initially did not intend to discuss these two components in the main  
636 text with the same level of detail as the central VSRE development and validation framework.

637 One reason that we retained a relatively brief but complete methodological description in the submitted  
638 manuscript was that the related vegetation classification study had not yet been formally published at the time of  
639 submission. To ensure the workflow remained understandable, we included methodological descriptions and accuracy  
640 information so readers could understand the data basis and the technical sources supporting national-scale VSRE  
641 mapping. During the review process, this independent study was published online. Therefore, in the revised  
642 manuscript, we will treat this section primarily through citation, supplemented by only brief necessary explanations,  
643 thereby reducing unnecessary interference with the main storyline.

644 Following your suggestion, we will make several revisions. We will further shorten the non-core descriptions of  
645 vegetation classification and mapping in the main text, move detailed technical implementation details, parameter  
646 settings, and supplementary results to the Supplementary Materials, and provide a clearer, more concise summary of  
647 the key classification and mapping results in the Results section. We will also more explicitly emphasize the auxiliary  
648 role of these components, so that they serve the main storyline of VSRE development, validation, and application  
649 rather than appearing as independent modules parallel to the manuscript's central focus.

650 This revision strategy is consistent with our **response to comment 5**. We believe that these adjustments will  
651 make the manuscript more focused and allow the vegetation classification and national-scale mapping components to  
652 better support the study's core objectives, with more appropriately proportioned coverage.

653

654 **Comment 21:** *Line 305: This level of accuracy suggests potential overfitting, which is a known issue for MLP models*  
655 *when trained on a limited number of samples.*

656 **Response:** We thank you for this important comment. We agree that MLP models can be prone to overfitting when  
657 sample sizes are limited. We also acknowledge that the description of this part in the original manuscript was not  
658 sufficiently clear, which may have led readers to confuse the cross-validation results used for model selection with  
659 the performance of the final tuned model on the independent test set.

660 We would like to clarify that our modeling workflow consisted of two stages. First, all 1,337 samples were  
661 divided into training and test sets at a ratio of 7:3. In the first stage, we performed 10-fold cross-validation on the  
662 training set for all candidate models and used cross-validation MAE as the primary criterion to compare the  
663 generalization ability of different algorithms. This procedure identified MLP as the best-performing model. In the  
664 second stage, after MLP was selected, we further optimized its hyperparameters using grid search and then evaluated  
665 the final tuned model on an independent test set.

666 Based on this workflow, we do not think the current results indicate substantial overfitting for three main reasons.  
667 First, model selection was based on the average performance of candidate models under tenfold cross-validation within  
668 the training set, and final predictive performance was evaluated on test samples independent of the training process.  
669 This is a standard modeling strategy that reduces the risk of model selection bias arising from random data partitioning.  
670 Second, the dataset used in this study comprised 1,337 in situ LiDAR quadrats distributed across the coast of China.  
671 For the task addressed here, namely the spatial extrapolation of VSRE, this sample size provides a reasonable basis  
672 for model training and evaluation, and the samples also have broad spatial representativeness. Third, the AEF  
673 embeddings integrate multi-source remote sensing data closely related to vegetation structure, including optical,  
674 LiDAR, and radar data. Therefore, the model's strong predictive performance is methodologically plausible and  
675 supported by the data, and does not necessarily indicate overfitting.

676 To avoid misunderstanding, we will further clarify in the revised manuscript which results were used for model  
677 selection and for comparing generalization ability, and which were used to demonstrate the predictive performance of  
678 the final tuned model on the independent test set.

679 **Revised text:**

680 *Main text: Line 297-311*

681 To evaluate model performance while reducing the risk of overfitting, all samples were first randomly divided into  
682 training and independent test sets at a ratio of 7:3. Within the training set, several mainstream machine learning and  
683 deep learning models were compared using tenfold cross-validation, with cross-validation MAE used as the primary  
684 criterion for model selection. After the Multilayer Perceptron (MLP) was identified as the best-performing candidate  
685 model (Pinkus, 1999), its hyperparameters were further optimized using grid search within the training workflow. The  
686 final hyperparameter-tuned MLP model was then evaluated on the independent test set and applied to generate the

687 2022 wall-to-wall VSRE map of coastal China at 10 m spatial resolution. The model comparison showed that MLP  
688 achieved the lowest cross-validation MAE among the candidate algorithms, indicating the strongest generalization  
689 ability during model selection (Supplementary Table S5). After hyperparameter tuning, the final MLP model achieved  
690 high predictive accuracy on the independent test set, with  $R^2=0.9613$ ,  $RMSE=2.812$ , and  $MAE=1.946$   
691 (Supplementary Table S5, Supplementary Figure S6). This performance suggests that the AEF embeddings contain  
692 structural information relevant to VSRE prediction and can support national-scale extrapolation from field LiDAR  
693 samples. Based on this model, we generated a seamless 10 m VSRE map for coastal vegetation across China in 2022.

694  
695 **Comment 22:** Line 332: you have defined the abbreviation of VSC before.

696 **Response:** Thank you for reminding. We have revised this error.

697  
698 **Comment 23:** Fig. 3: How were the three VSC groups defined? I could not find sufficient details on this. Notably,  
699 most existing metrics indicate that the “medium” group corresponds to relatively low VSC, whereas only your metric  
700 suggests otherwise. This raises questions about the criteria used to establish these groupings, particularly considering  
701 the difficulty to quantify VSC in real world.

702 **Response:** We thank you for this question. The three VSC plot groups are defined in detail in our **response to**  
703 **comment 3**; we briefly clarify them here. The low-, medium-, and high-VSC groups in this study were not defined by  
704 subjective visual assessment. Instead, they were derived from three typical community-structure scenarios generated  
705 within a controlled, near-natural experimental platform and supported by independent field survey data. Specifically,  
706 these three groups correspond to a monodominant herbaceous community, a mixed herbaceous community, and a  
707 herbaceous--woody community, respectively, representing a structural gradient from simple to complex. In addition,  
708 we used a biomass-weighted Shannon index as an independent external proxy to evaluate the rationale for this gradient;  
709 the results are shown in **Fig. S3**. Given the absence of a mature, unified framework for defining coastal vegetation  
710 structural complexity, we believe that this experimentally generated structural gradient, consistent with field  
711 observations and the logic of community succession, provides an ecologically meaningful and important baseline for  
712 metric evaluation.

713       Regarding the point that most existing metrics classified the medium group as having relatively low complexity,  
714 whereas VSRE did not, we do not think that this pattern indicates a problem with the grouping criteria. On the contrary,  
715 it reflects one of the key findings that this study aims to highlight: some conventional metrics cannot consistently  
716 capture the expected structural complexity gradient in coastal wetlands, which are open, low-stature, and spatially  
717 patchy ecosystems. As a result, these metrics may misclassify the medium-VSC group. By contrast, VSRE more  
718 accurately distinguishes the three predefined structural scenarios that are supported by independent external evidence.

719       To avoid similar confusion, we will further clarify the definitions of the three plot groups in the revised  
720 manuscript. We will also explicitly cross-reference the explanation provided in our **response to comment 3** and **Fig.**  
721 **S3** in the text related to **Fig. 3** to improve clarity.

722 **Revised text and Figure:**

723 Main text: Line 340-347

724 Across the low-, medium-, and high-water-level treatment groups, the VSC of the secondary plots showed a clear  
 725 decreasing gradient (*Methods, Fig. 1b*). This gradient was reflected not only in community composition, but also in  
 726 the intuitive structural differences observed in the field and in plot photographs. It was further supported by the  
 727 frequency distribution of the VSC proxy derived from the biomass-weighted Shannon index (*Supplementary Figures*  
 728 *S3*). We therefore consider the structural complexity gradient formed under the water-level treatments to provide a  
 729 reasonable baseline for evaluating the discriminatory ability of different VSC metrics. This baseline can also be used  
 730 to compare the performance of different metrics in distinguishing among levels of vegetation structural complexity.

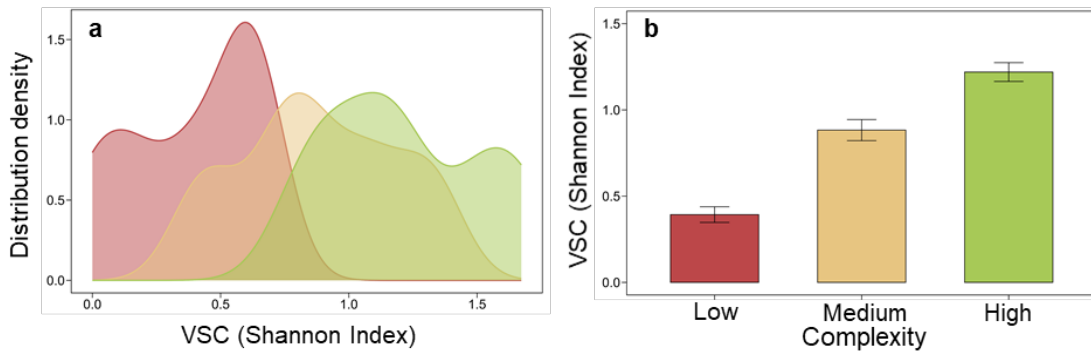

731 **Fig. S3 | VSC index distribution characteristics constructed based on the Shannon index. a,** the VSC distribution  
 732 curve was fitted using kernel density estimation. **b,** Mean values of VSC in groups with different human-defined  
 733 complexity. Error bars indicate standard deviation.

734 **Comment 24:** Line 362: Point density is not the only factor that should be considered (see my previous comments).  
 735 It would be helpful to include a vertical profile of the LiDAR data to better illustrate its structural characteristics. To  
 736 my knowledge, the DJI L1 sensor primarily captures returns from the upper canopy and has limited penetration into  
 737 lower layers. As a result, even with increasing point density, the additional points may still be disproportionately  
 738 concentrated in the upper canopy. This could artificially increase relative entropy by enhancing apparent dissimilarity  
 739 between layers, without necessarily reflecting changes in VSC.

740 **Response:** We appreciate your valuable comment. We agree that when LiDAR is applied to dense, closed vegetation,  
 741 vertical sampling bias and insufficient penetration into the lower canopy can substantially affect structural  
 742 characterization. However, this issue is less pronounced in the coastal wetland system examined in this study. As  
 743 described in the manuscript, the coastal wetland vegetation in our dataset is generally low in stature and has a relatively  
 744 open canopy structure, in contrast to the strongly vertically closed structure typical of mature forests. Under these  
 745 conditions, when point cloud density is sufficient, the lower canopy and, in many plots, the ground surface can still  
 746 be adequately sampled. This pattern is directly evident in the vertical-profile visualizations of many of our plots.  
 747 Therefore, we will add representative vertical profiles for several typical vegetation types in the revised manuscript to  
 748 more clearly illustrate this data characteristic and its limitations.

749 More importantly, we would like to clarify that the potential bias noted by you is one reason why VSRE showed  
 750 more stable performance than several conventional metrics. Traditional metrics such as canopy cover, FHD, and  
 751 canopy entropy are more directly affected by the vertical distribution of returns. For example, canopy cover depends  
 752 on the vertical distribution of returns. For example, canopy cover depends

754 on the proportion of returns above a fixed height threshold, whereas FHD is calculated from the occupancy distribution  
 755 of returns among vertical layers. Although canopy entropy attempts to reduce the effect of excessive point cloud  
 756 concentration in the upper canopy through resampling, as discussed in the manuscript, this procedure may also remove  
 757 important structural information and introduce additional noise.

758 By contrast, VSRE is not calculated directly from the raw return abundance within a single layer. Instead, it  
 759 characterizes structural differences based on normalized voxel-based spatial distributions within sliding windows.  
 760 This normalization step is intended to reduce the influence of local anomalies and overall variation in point cloud  
 761 density before relative entropy is compared. In this sense, VSRE cannot completely eliminate density-related effects,  
 762 but it can substantially reduce the risk of misinterpreting the enrichment of upper-layer returns, which may arise from  
 763 the inherent sampling tendency of UAV LiDAR toward upper-canopy elements, as an increase in structural complexity.

764 This interpretation is also consistent with our empirical results. If increasing point cloud density mainly amplified  
 765 artificial interlayer differences, VSRE would be expected to become less stable as sampling density increased.  
 766 However, we observed the opposite pattern. Under varying or mixed point cloud density conditions, several  
 767 conventional metrics showed unstable or even misleading responses, whereas VSRE consistently maintained the  
 768 clearest and most coherent discrimination among structural complexity groups.

769 **Revised Figures :**

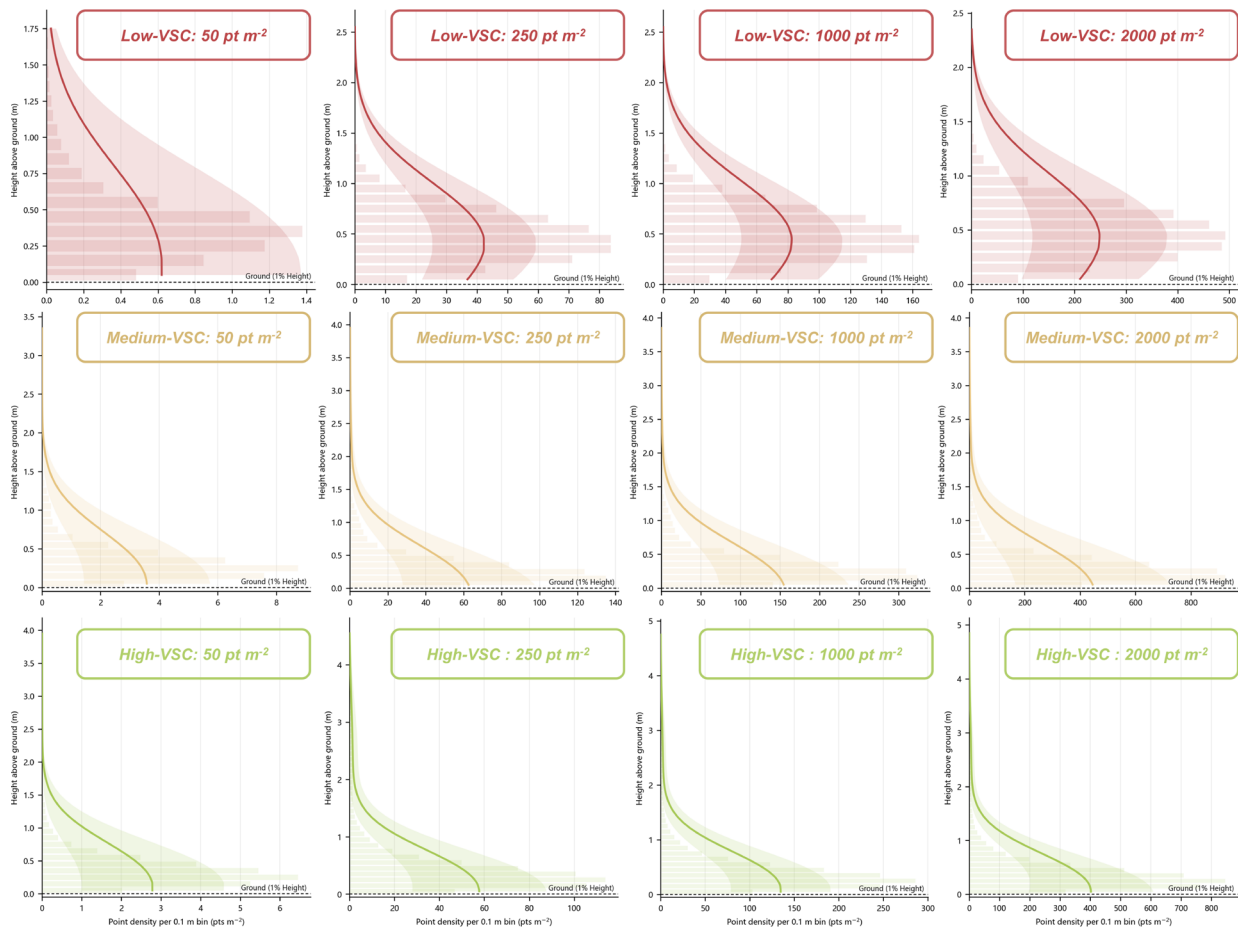

770

771 **Fig 1 | Vertical point-density profiles of fixed-plot samples across VSC groups and target LiDAR point-**

772 **cloud densities.** Vertical point-density profiles for fixed-plot samples of  $25 \times 25 \text{ m}^2$  grouped by vegetation  
 773 structural complexity (VSC) and target point-cloud density. Rows represent low-, medium-, and high-VSC  
 774 groups, and columns represent target point-cloud densities of 50, 250, 1000, and 2000  $\text{pt m}^{-2}$ . In each panel,  
 775 horizontal bars show the mean point density within 0.1 m vertical height bins, the solid curve shows the  
 776 Gaussian-smoothed mean profile, and the shaded envelope indicates variability among samples. Heights were  
 777 normalized relative to local ground, defined as the 1st percentile of point height and indicated by the black  
 778 dashed line. The x-axis shows point density per 0.1 m height bin, and the y-axis shows height above ground.

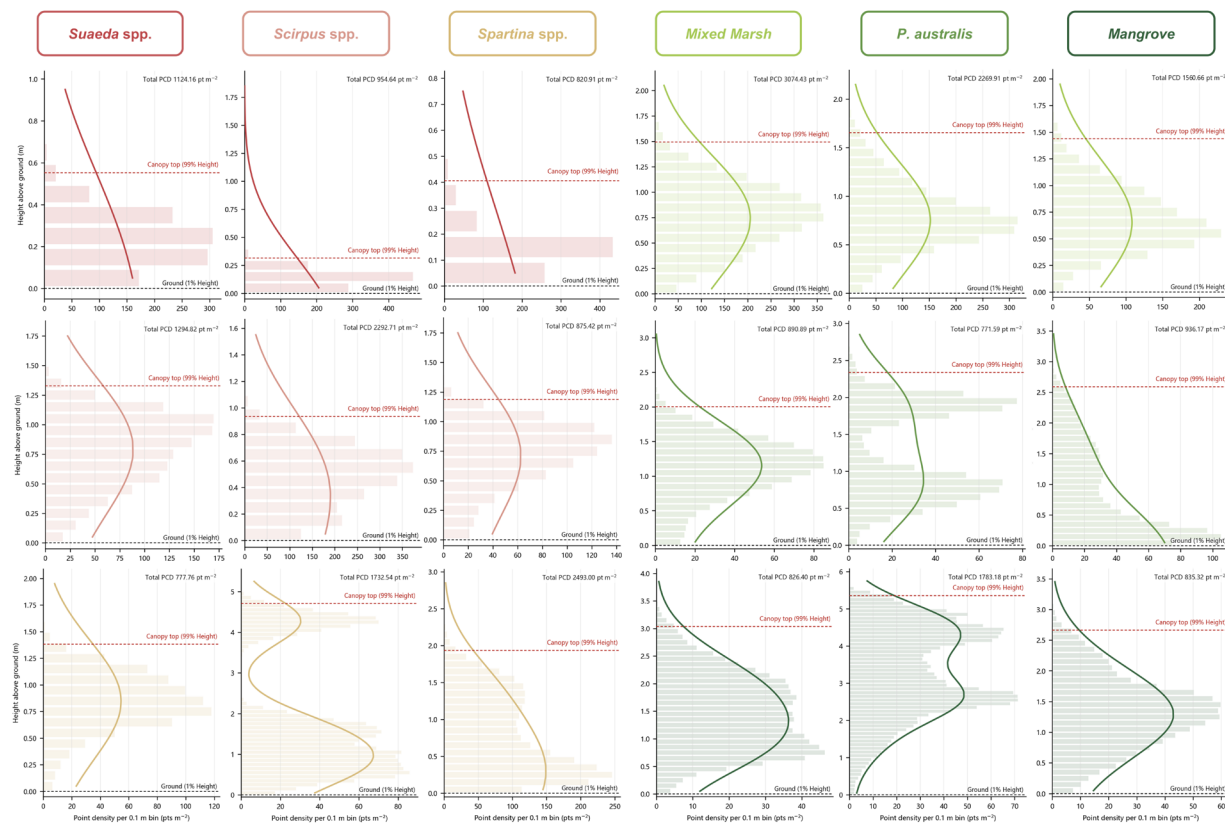

779  
 780 **Fig. 2 | Species-specific vertical point-density profiles of field-collected coastal wetland samples.** Vertical  
 781 point-density profiles of individual field-collected  $25 \times 25 \text{ m}^2$  m LAS samples across major coastal wetland  
 782 vegetation types, including Suaeda spp., Scirpus spp., Spartina spp., mixed marsh, Phragmites australis, and  
 783 mangrove. Each panel represents one field sample. Horizontal bars show point density within 0.1 m vertical  
 784 height bins, and the solid curve shows the smoothed vertical distribution of point density. The PCD values in the  
 785 upper-right corner indicate the total point-cloud density for each sample, calculated as the total point count  
 786 divided by the plot area. Heights were normalized using the 1st percentile of point height as local ground,  
 787 indicated by the black dashed line. The red dashed line marks canopy top height, defined as the 99th percentile  
 788 of normalized point height.

789

790 **Comment 25:** *Line 386: High species diversity does not necessarily mean high canopy structural complexity. Please*  
791 *see my general comment.*

792 **Response:** We appreciate you raising this point. We agree that higher species diversity does not necessarily imply  
793 higher canopy structural complexity, and that these two concepts are not ecologically equivalent. Our intention was  
794 not to use biodiversity, especially species diversity, as a direct definition or ground truth of canopy structural  
795 complexity.

796 As clarified in our responses to Comments 3 and 4, the structural gradient among the three plot groups in this  
797 study was primarily derived from three typical community-structure scenarios formed within a controlled near-natural  
798 experimental platform, rather than being directly defined by biodiversity metrics. In addition, the continuous-gradient  
799 analysis was not based solely on species richness, but on a biomass-weighted Shannon index. This index was used  
800 only as an independent external ecological reference to examine whether different structural metrics could respond to  
801 objectively existing continuous gradients among communities, rather than as a direct substitute for VSC.

802 We acknowledge that the original wording may have led readers to interpret the analysis as implying that higher  
803 species diversity is equivalent to higher structural complexity. In the revised manuscript, we will further clarify the  
804 distinction between biodiversity and canopy structural complexity. We will also emphasize that the purpose of this  
805 analysis is to provide supplementary support for the ecological relevance and gradient sensitivity of VSRE, rather than  
806 to use biodiversity-based comparisons as direct evidence of VSRE's superiority.

807  
808 **Comment 26:** *Line 471-484 and Fig. 9: I may be misunderstanding something here, but I am not clear how these*  
809 *conclusions are derived. Wouldn't a mature forest with strong canopy complementarity exhibit a near-random*  
810 *distribution of canopy elements, and therefore correspond to high entropy.*

811 **Response:** We appreciate this important and insightful comment from you. We agree that, in mature forests, strong  
812 canopy complementarity may cause the point-cloud distribution to approach spatial saturation or a relatively uniform  
813 distribution. Under such conditions, entropy-based metrics may yield high values, and this high entropy can, to some  
814 extent, reflect the high canopy structural complexity of mature forests. Therefore, our original manuscript did not  
815 intend to deny the possibility that mature forests may exhibit high entropy.

816 What we intended to emphasize is that high information entropy is not necessarily equivalent to high ecological  
817 vegetation structural complexity. Information entropy primarily measures whether the occupancy probability of point  
818 clouds within predefined spatial units, voxels, or height layers is uniform. In other words, it quantifies the uncertainty  
819 of a point occurring at a particular spatial location. When point clouds are more uniformly distributed among spatial  
820 units, information entropy generally increases. However, ecologically meaningful VSC depends not only on whether  
821 space is uniformly occupied, but also on whether vegetation structures exhibit multilayered, multicomponent,  
822 multiscale, and locally heterogeneous three-dimensional organization.

823 The mature forest example raised by you helps clarify this distinction. High information entropy in mature forests  
824 often does not arise from completely unconstrained random arrangements. Rather, it can result from structural  
825 complementarity among tree crowns, trunks, understory vegetation, gaps, and different height layers. These structural  
826 elements are organized under ecological and architectural constraints, including competition for growth, light resource

827 use, and spatial niche differentiation. As a result, complex local structures may ultimately produce relatively full and  
828 uniform spatial occupation at the point-cloud or voxel scale. In this case, high entropy can be understood as a  
829 consequential expression of complex structures approaching spatial saturation.

830 The key limitation is that information entropy primarily focuses on the final uniformity of occupancy and does  
831 not distinguish whether this uniformity arises from the complementary stacking of diverse structural units or from the  
832 repetitive arrangement of simple structural units. For example, a mature forest may show high entropy because many  
833 different local structural configurations complement one another in three-dimensional space. However, a dense, fast-  
834 growing monospecific stand may also produce relatively uniform voxel-scale point-cloud occupancy because many  
835 similar structural units are repeatedly arranged in space. The high entropy of the former reflects structural  
836 complementarity and local configurational diversity, whereas the latter's high entropy reflects dense repetition and  
837 uniform filling. Although these two cases may appear similar in terms of information entropy, they are not equivalent  
838 in ecological VSC.

839 This issue is particularly relevant in coastal wetlands. Unlike mature forests, many coastal wetland communities  
840 are dominated by one or a few species, such as dense *Phragmites australis*, *Spartina alterniflora* or other graminoid  
841 saltmarsh communities. Although these communities may consist of relatively simple and repetitive structural units,  
842 their point clouds may still show relatively uniform occupancy across many spatial units when vegetation density is  
843 high and voxel size or vertical stratification is coarse. In such cases, entropy-based metrics may mistakenly interpret  
844 dense, uniform, and repetitive occupancy as high structural complexity. Conversely, some multispecies mixed  
845 communities may not have the most uniform overall spatial occupancy, but may exhibit higher ecological structural  
846 complexity because local windows differ substantially in their three-dimensional configurations, including differences  
847 in height-layer combinations, gap structure, and herbaceous--woody organization.

848 By contrast, VSRE was not designed to measure whether the entire plot space is uniformly filled. Instead, it  
849 constructs local voxel distributions using three-dimensional sliding windows and compares spatial distribution  
850 differences among local windows. Thus, VSRE focuses on differences in local structural configurations rather than  
851 on the uniformity of global spatial occupancy. If a community has a relatively uniform point-cloud distribution but  
852 highly repetitive local structures, VSRE will not be strongly inflated by uniform occupancy alone. If different local  
853 windows contain substantially different three-dimensional structural configurations, VSRE will more sensitively  
854 capture this configurational heterogeneity. We believe that this is an important reason why VSRE distinguished  
855 different VSC gradients in coastal wetlands more consistently than conventional metrics such as CE and FHD in this  
856 study. Our results also show that FHD, canopy cover, and canopy entropy were prone to misclassifying moderately  
857 complex communities under varying point cloud densities, whereas VSRE more stably distinguished low-, medium-,  
858 and high-VSC groups.

859 Therefore, we agree that the mature forest scenario noted by you is an important case in which information  
860 entropy can closely match VSC, especially when canopy structure is highly developed and approaches spatial  
861 saturation. However, across the continuous transition from simple to complex communities, particularly in coastal  
862 wetlands where dense monospecific communities are common, the relationship between information entropy and VSC  
863 is not necessarily strictly monotonic. Our original intention in Fig. 9 was to express this potential inconsistency.

864 However, we agree that the wording in the original manuscript was too simplified and may have led readers to infer  
865 that mature forests always have low entropy or that entropy-based metrics are generally ineffective.

866 Accordingly, we will revise the relevant text in the revised manuscript. First, we will delete or weaken the  
867 overgeneralized statement that mature forests may have lower information entropy than secondary forests, and we will  
868 explicitly acknowledge that mature forests may indeed exhibit high information entropy under conditions of spatial  
869 saturation and strong canopy complementarity. Second, we will emphasize that Fig. 9 is a conceptual diagram rather  
870 than a universal empirical rule. Its purpose is not to suggest that CE or FHD necessarily follows a fixed curve, but to  
871 illustrate that entropy-based metrics primarily reward spatial occupancy uniformity. Therefore, VSC may be  
872 overestimated in communities with repetitive structures but uniform point-cloud occupancy. Third, we will further  
873 distinguish spatial occupancy uniformity from ecological structural complexity by explaining that high entropy may  
874 arise from either the multilayered, complementary structure of mature forests or the uniform occupancy of simple,  
875 repetitive communities. For this reason, entropy alone should not be used as a sufficient criterion for ecological VSC.

876 We are therefore grateful for your reminder. This comment helped us recognize that the original description of  
877 the relationship between information entropy and VSC was too absolute. In the revised manuscript, we will explain  
878 more cautiously that information entropy can effectively reflect complexity in spatially saturated and multilayered  
879 canopy structures, but in coastal wetlands, especially in dense, repetitive, monospecific communities, it may reflect  
880 spatial occupancy uniformity more than local structural heterogeneity. We will also revise the description of Fig. 9  
881 accordingly, presenting it as a conceptual illustration of the possible nonmonotonic or context-dependent relationship  
882 between entropy-based metrics and ecological VSC.

883 **Revised text:**

884 Main text: Line 481-521

885 The concept of entropy originates from physics, where it describes the degree of disorder within a system. Since  
886 Shannon introduced it into information theory, information entropy (IE) has been widely applied in digital information  
887 processing (Cover and Thomas, 1991). More recently, following previous work using IE (FHD, CE) to point cloud  
888 data to quantify forest canopy complexity (Liu et al., 2022), many studies have been conducted in-depth analyses of  
889 the ecological functions and structural characteristics of forest canopies based on this concept (Liu et al., 2024; De  
890 Conto et al., 2024; Wang et al., 2023).

891 However, when point-cloud IE is used directly as a proxy for VSC, an important conceptual limitation arises. In  
892 voxelized point clouds, IE primarily quantifies the evenness or uncertainty of point occupancy within predefined  
893 spatial units, such as voxels or height layers. It reaches its maximum when point occupancy is uniformly distributed  
894 and its minimum when points are concentrated in a small number of spatial units. Thus, high IE indicates uniform  
895 spatial occupancy, but such uniformity is not necessarily equivalent to ecological structural complexity. Mature forests  
896 provide an important case in which high IE may correspond well with high VSC, because canopy complementarity,  
897 vertical stratification, crown packing, trunks, understory vegetation, and gaps can jointly produce a saturated, spatially  
898 uniform point-cloud distribution. Yet IE does not distinguish between uniformity arising from complementary  
899 arrangements of diverse structural units and that arising from repetitive arrangements of simple structural units (**Fig.**  
900 **10**).

901 This distinction is particularly important in coastal wetlands, where dense reed stands, *Spartina alterniflora* marshes,  
 902 and other graminoid communities may consist of simple, repetitive structures yet exhibit uniform occupancy across  
 903 voxels or height layers. In such cases, entropy-based metrics may overestimate VSC by interpreting dense, repetitive  
 904 filling as structural complexity. Conversely, multispecies mixed communities may show lower global occupancy  
 905 evenness but higher ecological VSC because their local structural configurations vary across space. Therefore, the  
 906 relationship between entropy-based metrics and ecological VSC is context-dependent rather than universally  
 907 monotonic. Fig. 10 illustrates this potential mismatch and helps explain why the high-water-level group in our results  
 908 showed lower ecological VSC but higher CE and FHD values than the medium-water-level group (**Fig. 4b**).  
 909 A further limitation of information-entropy-based metrics is their sensitivity to point cloud density and sampling  
 910 distribution. Ideally, once point cloud density is sufficient to characterize vegetation three-dimensional structure,  
 911 additional points should mainly reduce measurement noise rather than systematically alter the estimated VSC.  
 912 However, IE is calculated from point-occupancy probabilities within voxels or height layers and therefore assumes  
 913 that the observed point-cloud distribution accurately reflects the underlying vegetation structure. This assumption is  
 914 often difficult to satisfy in LiDAR data, because point clouds are influenced by flight altitude, scan angle, return mode,  
 915 canopy occlusion, sensor penetration, and surface reflectance. As point cloud density increases, newly added points  
 916 may be disproportionately concentrated in upper canopies, outer surfaces, or high-reflectance regions rather than being  
 917 distributed proportionally across all structural elements. In addition, IE has an upper bound determined by voxel size,  
 918 vertical stratification, and plot extent; increasing point cloud density may fill more voxels and move the observed  
 919 distribution toward this saturation limit. As a result, changes in IE may reflect a mixture of true structural variation,  
 920 density effects, and sampling bias, rather than ecological structural complexity alone (**Fig. 10**).

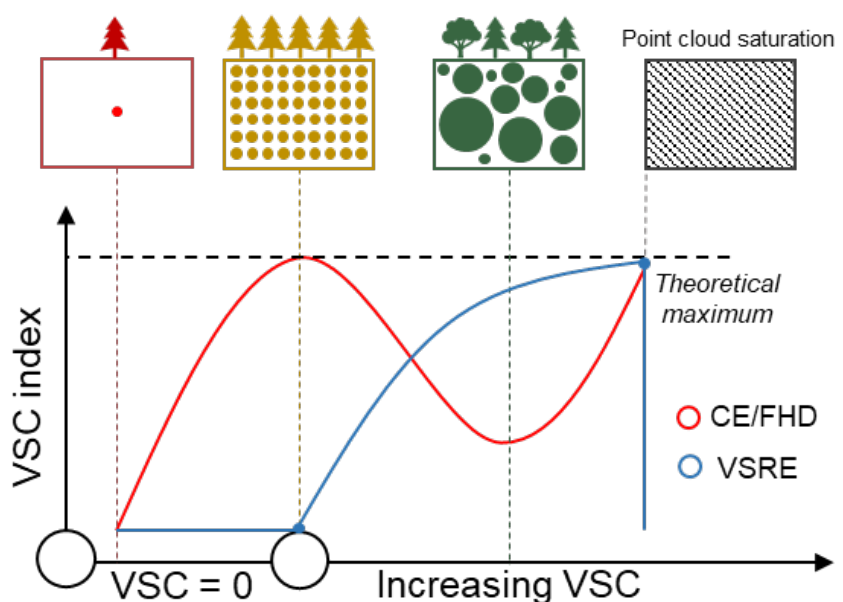

921  
 922 **Fig. 10 | Theoretical trends of VSRE and CE/FHD as VSC increases.**  
 923

924 **Comment 27:** Line 493-494: I am lost again here. What do you mean by structural reproducibility?.

925 **Response:** We appreciate you pointing out the ambiguity of this statement. We agree that the term "structural  
926 reproducibility" may be misunderstood. Our intention was not to refer to repeated measurement of the same structure  
927 or to experimental reproducibility. Rather, we intended to describe whether similar structural configuration patterns  
928 repeatedly occur across different local spatial windows.

929 More specifically, the VSRE calculation does not focus on the uniformity of the point cloud within a single  
930 window. Instead, it compares three-dimensional voxel distributions across multiple local windows. If local structures  
931 at different positions within an ecosystem are highly similar, for example, if similar layering patterns, spatial filling  
932 modes, and local organizational forms repeatedly appear across windows, then the distributional differences among  
933 these windows will be small, and the corresponding relative entropy will be low. This was the intended meaning of  
934 our original statement that greater structural reproducibility indicates lower VSC: when local structures are highly  
935 repetitive in space and show limited configurational variation, spatial heterogeneity is low, and VSRE is therefore also  
936 low.

937 Conversely, if structural configurations differ substantially among local windows, for example, if some windows  
938 contain tall and dense canopy elements, some contain clear gaps, and others contain mixed herbaceous-woody  
939 structures, then the distributional differences among local structures will increase, and the corresponding relative  
940 entropy will also increase. In this case, VSRE reflects stronger heterogeneity among local structural configurations.

941 We therefore agree that "structural reproducibility" is not sufficiently intuitive. To avoid further confusion, we  
942 will replace this term in the revised manuscript with the clearer phrase "similarity among local structural configurations".  
943 This wording better conveys our intended meaning: VSRE measures the degree of difference among local structural  
944 configurations, rather than the randomness or uniformity within a single local structure.

945  
946 **Comment 28:** *Line 507: I did not put too much focus on the discussion on the national mapping here, because I think*  
947 *this should be put in a separate paper.*

948 **Response:** We appreciate you raising this point. We understand the concern that the national-scale mapping  
949 component could be developed into a separate article, which is consistent with the suggestion raised in the general  
950 comments. As explained in our responses to Comments 5 and 15, we agree that this component occupied a substantial  
951 portion of the original manuscript and may have partly distracted from the main storyline.

952 However, we still believe that national-scale mapping plays a necessary supporting role in this study. Its primary  
953 purpose is not to present an independent mapping study, but to demonstrate the applicability of VSRE in a real-world,  
954 large-scale setting. By extending VSRE from local development and validation to regional-scale data production, this  
955 component illustrates the practical potential of the metric and its value for broader ecological applications.

956 In response to the this suggestion, we will further shorten this section in the revised manuscript. We will reduce  
957 its appearance as an independent module and more clearly position it as supplementary evidence for the application  
958 potential of VSRE, rather than as a core research section parallel to the methodological development. A more detailed  
959 explanation of these structural adjustments is provided in our **responses to comments 5 and 15**.

960

961 **Reference**

- 962 Cousins, S. H.: Species diversity measurement: choosing the right index, *Trends Ecol. Evol.*, 6, 190-192, 1991.
- 963 Cover, T. M. and Thomas, J. A.: Entropy, relative entropy and mutual information, *Elements of information theory*,  
964 2, 12-13, 1991.
- 965 Coverdale, T. C. and Davies, A. B.: Unravelling the relationship between plant diversity and vegetation structural  
966 complexity: A review and theoretical framework, *J. Ecol.*, 111, 1378-1395, 2023.
- 967 de Conto, T., Armston, J., and Dubayah, R.: Characterizing the structural complexity of the Earth's forests with  
968 spaceborne lidar, *Nat. Commun.*, 15, 8116, 2024.
- 969 Dobson, J. E.: NOAA Coastal Change Analysis Program (C-CAP): guidance for regional implementation, 1995.
- 970 Fick, S. E. and Hijmans, R. J.: WorldClim 2: new 1-km spatial resolution climate surfaces for global land areas, *Int.*  
971 *J. Climatol.*, 37, 4302-4315, 2017.
- 972 Fischer, F. J., Maréchaux, I., and Chave, J.: Improving plant allometry by fusing forest models and remote sensing,  
973 *New Phytol.*, 223, 1159-1165, 2019.
- 974 He, Q., Li, Z. a., Daleo, P., Lefcheck, J. S., Thomsen, M. S., Adams, J. B., and Bouma, T. J.: Coastal wetland  
975 resilience through local, regional and global conservation, *Nat. Rev. Biodivers.*, 1, 50-67, 10.1038/s44358-024-  
976 00004-x, 2025.
- 977 Jucker, T., Fischer, F. J., Chave, J., Coomes, D. A., Caspersen, J., Ali, A., Loubota Panzou, G. J., Feldpausch, T. R.,  
978 Falster, D., and Usoltsev, V. A.: Tallo: A global tree allometry and crown architecture database, *Global Change Biol.*,  
979 28, 5254-5268, 2022.
- 980 Keller, M., Schimel, D. S., Hargrove, W. W., and Hoffman, F. M.: A continental strategy for the National Ecological  
981 Observatory Network, *The Ecological Society of America*: 282-284, 2008.
- 982 Krishnan, S., Crosby, C., Nandigam, V., Phan, M., Cowart, C., Baru, C., and Arrowsmith, R.: OpenTopography: a  
983 services oriented architecture for community access to LIDAR topography, *Proceedings of the 2nd international*  
984 *conference on computing for Geospatial Research & Applications*, 1-8,
- 985 Kulp, S. A. and Strauss, B. H.: CoastalDEM: A global coastal digital elevation model improved from SRTM using a  
986 neural network, *Remote Sens. Environ.*, 206, 231-239, 2018.
- 987 LaFond-Hudson, S. and Sulman, B.: Modeling strategies and data needs for representing coastal wetland vegetation  
988 in land surface models, *New Phytol.*, 238, 938-951, 10.1111/nph.18760, 2023.
- 989 Liu, X., Ma, Q., Wu, X., Hu, T., Liu, Z., Liu, L., Guo, Q., and Su, Y.: A novel entropy-based method to quantify  
990 forest canopy structural complexity from multiplatform lidar point clouds, *Remote Sens. Environ.*, 282, 113280,  
991 2022.
- 992 Liu, X., Feng, Y., Hu, T., Luo, Y., Zhao, X., Wu, J., Maeda, E. E., Ju, W., Liu, L., and Guo, Q.: Enhancing ecosystem  
993 productivity and stability with increasing canopy structural complexity in global forests, *Sci. Adv.*, 10, ead11947,  
994 2024.
- 995 Moffett, K. B., Nardin, W., Silvestri, S., Wang, C., and Temmerman, S.: Multiple stable states and catastrophic shifts  
996 in coastal wetlands: Progress, challenges, and opportunities in validating theory using remote sensing and other  
997 methods, *Remote Sens.*, 7, 10184-10226, 2015.

998 Pinkus, A.: Approximation theory of the MLP model in neural networks, *Acta Numer.*, 8, 143-195, 1999.

999 Qi, G., Wei, J., Li, H., Xie, T., Li, L., Wang, F., He, Q., Mudd, S. M., and Ma, J.: Insight into rapid vegetation  
1000 dynamics in China's saltmarshes reveals overlooked coastal soil carbon storage, *One Earth*, 9, 2026.

1001 Taddeo, S., Dronova, I., and Depsky, N.: Spectral vegetation indices of wetland greenness: Responses to vegetation  
1002 structure, composition, and spatial distribution, *Remote Sens. Environ.*, 234, 111467, 2019.

1003 Wang, X., Rahman, M. A., Mokroš, M., Rötzer, T., Pattnaik, N., Pang, Y., Zhang, Y., Da, L., and Song, K.: The  
1004 influence of vertical canopy structure on the cooling and humidifying urban microclimate during hot summer days,  
1005 *Landscape Urban Plann.*, 238, 104841, 2023.

1006 Weilhoefer, C.: A review of indicators of estuarine tidal wetland condition, *Ecol. Indic.*, 11, 514-525, 2011.

1007 Yando, E. S., Jones, S. F., James, W. R., Colombano, D. D., Montemayor, D. I., Nolte, S., Raw, J. L., Ziegler, S. L.,  
1008 Chen, L., and Daffonchio, D.: An integrative salt marsh conceptual framework for global comparisons, *Limnol.*  
1009 *Oceanogr. Lett.*, 8, 830-849, 10.1002/lol2.10346, 2023.

1010 Yu, J., Nie, S., Liu, W., Sun, Z., Wang, C., Xi, X., Zhu, X., and Fang, M.: Evaluating and comparing the  
1011 performance of ICESat-2 and GEDI data for estimating aboveground biomass in mangroves, *Int. J. Digital Earth*, 19,  
1012 2627082, 2026.

1013 Zhao, Y., Zhen, Z., Zhang, Z., Guan, X., Wang, J., and Zhao, Y.: Spatial occupancy index of tree crown: Can provide  
1014 new perspectives for quantifying structural complexity of individual tree crowns, *Remote Sens. Environ.*, 335,  
1015 115277, 2026.

1016
